# Supplementary material
Source: publisher site journal article supplement (https://www.spandidos-publications.com/7067/downloadSupplementary)
Supplement: Supplementary file 1 [file downloadSupplementary]

## Sheet: Sheet1
Table SI. DEGs in the AL vs. control groups.
Gene_id	Gene	Gene description	Aseptic loosening	Control	FC (aseptic loosening/control)	Log2FC	P-value	Adjusted P-value	Regulation	Aseptic loosening 1	Aseptic loosening 12	Aseptic loosening 13	Aseptic loosening 2	Aseptic loosening 3	Aseptic loosening 6	Aseptic loosening 8	Aseptic loosening 9	Control 1	Control 10	Control 2	Control 3	Control 4	Control 5	Control 6	Control 8
ENSG00000099725	PRKY	protein kinase Y-linked (pseudogene) [Source:HGNC Symbol;Acc:HGNC:9444]	1.9975	0	3.28262e+07	24.9683	3.64046e-21	8.18811e-17	up	5.45	0	0.01	0	4.95	5.56	0	0.01	0	0	0	0	0	0	0	0
ENSG00000186439	TRDN	triadin [Source:HGNC Symbol;Acc:HGNC:12261]	0	87.6762	5.46922e-09	-27.446	2.75597e-20	3.09936e-16	down	0	0	0	0	0	0	0	0	0	0.02	0	5.69	535.62	159.94	0.09	0.05
ENSG00000067048	DDX3Y	DEAD-box helicase 3 Y-linked [Source:HGNC Symbol;Acc:HGNC:2699]	15.835	0	1.1786e+08	26.8125	1.96978e-19	1.10761e-15	up	41.66	0	0	0	40.89	44.13	0	0	0	0	0	0	0	0	0	0
ENSG00000129824	RPS4Y1	ribosomal protein S4 Y-linked 1 [Source:HGNC Symbol;Acc:HGNC:10425]	54.8825	0	1.23568e+08	26.8807	1.5972e-19	1.10761e-15	up	158.66	0	0	0	115.86	164.54	0	0	0	0	0	0	0	0	0	0
ENSG00000114374	USP9Y	ubiquitin specific peptidase 9 Y-linked [Source:HGNC Symbol;Acc:HGNC:12633]	6.61875	0	6.62553e+07	25.9815	2.42827e-18	1.09233e-14	up	16.05	0	0	0.04	14.92	21.94	0	0	0	0	0	0	0	0	0	0
ENSG00000115593	SMYD1	SET and MYND domain containing 1 [Source:HGNC Symbol;Acc:HGNC:20986]	0	24.9337	1.85809e-08	-25.6816	5.89597e-18	2.2102e-14	down	0	0	0	0	0	0	0	0	0	0	0	1.01	146.57	51.89	0	0
ENSG00000291033	TXLNGY	taxilin gamma pseudogene, Y-linked [Source:NCBI gene (formerly Entrezgene);Acc:246126]	7.1475	0	4.8797e+07	25.5403	8.93485e-18	2.8709e-14	up	22.19	0	0	0	13.2	21.79	0	0	0	0	0	0	0	0	0	0
ENSG00000156885	COX6A2	cytochrome c oxidase subunit 6A2 [Source:HGNC Symbol;Acc:HGNC:2279]	0	415.945	3.82309e-08	-24.6407	1.18863e-16	3.34184e-13	down	0	0	0	0	0	0	0	0	0	0	0	32.95	2401.97	892.64	0	0
ENSG00000130957	FBP2	fructose-bisphosphatase 2 [Source:HGNC Symbol;Acc:HGNC:3607]	0	18.9138	5.10866e-08	-24.2225	3.84542e-16	9.61012e-13	down	0	0	0	0	0	0	0	0	0.08	0	0	0.09	89.71	61.43	0	0
ENSG00000133020	MYH8	myosin heavy chain 8 [Source:HGNC Symbol;Acc:HGNC:7578]	0	3.34875	9.15032e-08	-23.3816	3.84579e-15	8.64995e-12	down	0	0	0	0	0	0	0	0	0	0	0	0.11	20.71	5.97	0	0
ENSG00000108878	CACNG1	calcium voltage-gated channel auxiliary subunit gamma 1 [Source:HGNC Symbol;Acc:HGNC:1405]	0	17.21	1.04244e-07	-23.1935	6.32837e-15	1.29398e-11	down	0	0	0	0	0	0	0	0	0	0	0	4.09	86.87	46.72	0	0
ENSG00000185847	LINC01405	long intergenic non-protein coding RNA 1405 [Source:HGNC Symbol;Acc:HGNC:50688]	0	154.591	1.49087e-07	-22.6773	2.47897e-14	4.64642e-11	down	0	0	0	0	0	0	0	0	0	0	0	0.58	980.55	255.6	0	0
ENSG00000205678	TECRL	trans-2,3-enoyl-CoA reductase like [Source:HGNC Symbol;Acc:HGNC:27365]	0	3.54125	1.57994e-07	-22.5936	3.10887e-14	5.37883e-11	down	0	0	0	0	0	0	0	0	0	0	0	0.45	20.73	7.15	0	0
ENSG00000104879	CKM	creatine kinase, M-type [Source:HGNC Symbol;Acc:HGNC:1994]	0.1725	1543.34	0.000292642	-11.7386	1.05704e-13	1.69822e-10	down	0.05	0.06	0.16	0.06	0.21	0.26	0.32	0.26	0.19	0.31	0.12	146.67	8381.09	3817.47	0.26	0.6
ENSG00000185028	LRRC14B	leucine rich repeat containing 14B [Source:HGNC Symbol;Acc:HGNC:37268]	0	1.74125	2.65525e-07	-21.8447	2.13662e-13	3.20379e-10	down	0	0	0	0	0	0	0	0	0	0	0	0.04	8.81	5.08	0	0
ENSG00000227877	MRLN	myoregulin [Source:HGNC Symbol;Acc:HGNC:48649]	0	17.7963	2.70558e-07	-21.8176	2.2886e-13	3.2172e-10	down	0	0	0	0	0	0	0	0	0	0	0	1.33	105.23	35.62	0.19	0
ENSG00000009709	PAX7	paired box 7 [Source:HGNC Symbol;Acc:HGNC:8621]	0	0.62	3.4002e-07	-21.4879	5.24949e-13	6.94539e-10	down	0	0	0	0	0	0	0	0	0	0	0	0.13	3.33	1.5	0	0
ENSG00000134184	GSTM1	glutathione S-transferase mu 1 [Source:HGNC Symbol;Acc:HGNC:4632]	0.3975	18.5675	0.0053234	-7.55344	1.8334e-12	2.29094e-09	down	0.6	0.42	1.04	0	0.28	0.26	0.58	0	26.83	29.21	0	43.35	0.95	25.21	0.25	22.74
ENSG00000164879	CA3	carbonic anhydrase 3 [Source:HGNC Symbol;Acc:HGNC:1374]	0.38625	1079.42	0.0020748	-8.91281	9.01588e-12	1.06729e-08	down	0.1	1.24	0.51	0.46	0.14	0.14	0.1	0.4	1.41	0.66	0.16	29.37	7549.31	1043.85	1.78	8.86
ENSG00000173991	TCAP	titin-cap [Source:HGNC Symbol;Acc:HGNC:11610]	0.3875	841.75	0.00127329	-9.61722	1.2821e-10	1.44185e-07	down	0.61	0.88	0.21	0.12	0.19	0.55	0.3	0.24	0.46	0.22	0.12	32.69	4775.88	1923.29	1.14	0.2
ENSG00000159173	TNNI1	troponin I1, slow skeletal type [Source:HGNC Symbol;Acc:HGNC:11945]	0.0875	701.621	0.000474943	-11.04	1.69333e-10	1.8102e-07	down	0.21	0.01	0.03	0	0.01	0.18	0.2	0.06	0	0.09	0.24	75.35	4284.26	1252.83	0.19	0.01
ENSG00000181418	DDN	dendrin [Source:HGNC Symbol;Acc:HGNC:24458]	0.07	18.4275	0.00287405	-8.4427	1.7706e-10	1.8102e-07	down	0.12	0.04	0.09	0.14	0.02	0.08	0	0.07	0.07	0.08	0.15	10.32	9.98	126.58	0.08	0.16
ENSG00000143632	ACTA1	actin alpha 1, skeletal muscle [Source:HGNC Symbol;Acc:HGNC:129]	0.22	3745.44	0.000185543	-12.396	1.44706e-09	1.4151e-06	down	0.17	0	0.04	0.07	0.06	0.06	0.06	1.3	0.14	0	0	41.62	21619.7	8301.77	0.28	0.06
ENSG00000175084	DES	desmin [Source:HGNC Symbol;Acc:HGNC:2770]	10.3912	839.999	0.00709263	-7.13946	1.95358e-09	1.80843e-06	down	1.95	12.57	5.1	14.05	21.51	6.11	3.12	18.72	61.4	3.16	2.13	267.07	3140.39	3207.97	31.29	6.58
ENSG00000183091	NEB	nebulin [Source:HGNC Symbol;Acc:HGNC:7720]	1.1725	514.304	0.00433345	-7.85027	2.01008e-09	1.80843e-06	down	1.05	1.05	0.87	1.21	1.31	1.46	1.23	1.2	1.3	1.03	0.62	40.57	2513.26	1555.27	1.24	1.14
ENSG00000086967	MYBPC2	myosin binding protein C2 [Source:HGNC Symbol;Acc:HGNC:7550]	0.08125	84.7438	0.000236253	-12.0474	3.13695e-09	2.61319e-06	down	0	0	0.05	0.5	0.02	0.02	0.06	0	0	0	0.02	31.51	257.64	388.44	0	0.34
ENSG00000114854	TNNC1	troponin C1, slow skeletal and cardiac type [Source:HGNC Symbol;Acc:HGNC:11943]	0.105	2156.64	0.00023332	-12.0654	3.08358e-09	2.61319e-06	down	0	0.34	0.34	0	0	0	0.16	0	1.13	0	0.39	119.41	14362.1	2768.48	1.3	0.33
ENSG00000101470	TNNC2	troponin C2, fast skeletal type [Source:HGNC Symbol;Acc:HGNC:11944]	0.50375	1778.94	0.00141151	-9.46854	3.26212e-09	2.62042e-06	down	0.27	1.71	0.47	0.31	0	0.49	0	0.78	0.38	0.35	0.94	72.14	11378	2778.44	0.66	0.66
ENSG00000077522	ACTN2	actinin alpha 2 [Source:HGNC Symbol;Acc:HGNC:164]	0.765	217.416	0.00430995	-7.85811	3.74875e-09	2.90748e-06	down	0.14	0.19	2.35	1.52	1.3	0.3	0.25	0.07	0.16	0.8	0.81	28.7	998.91	708.11	0.12	1.72
ENSG00000198125	MB	myoglobin [Source:HGNC Symbol;Acc:HGNC:6915]	0.31125	2193.34	0.000203904	-12.2598	4.47826e-09	3.3575e-06	down	0	0	0	1.02	0.17	0.38	0	0.92	0.25	0	0.2	258.17	12218.3	5069.25	0.29	0.27
ENSG00000163380	LMOD3	leiomodin 3 [Source:HGNC Symbol;Acc:HGNC:6649]	0.1275	36.8425	0.0149666	-6.06211	6.11566e-09	4.43721e-06	down	0.08	0.19	0.16	0.07	0.12	0.14	0.09	0.17	0.17	0.05	0.12	4.15	210.46	79.1	0.48	0.21
ENSG00000129910	CDH15	cadherin 15 [Source:HGNC Symbol;Acc:HGNC:1754]	0.105	5.5025	0.0128127	-6.28629	7.47757e-09	5.2558e-06	down	0.03	0.22	0.26	0.13	0	0.13	0	0.07	2.14	0.21	0	0.99	19.81	11.29	0.02	9.56
ENSG00000196296	ATP2A1	ATPase sarcoplasmic/endoplasmic reticulum Ca2+ transporting 1 [Source:HGNC Symbol;Acc:HGNC:811]	0.57625	189.989	0.00450817	-7.79324	8.97489e-09	6.11707e-06	down	0.43	1.01	0.68	0.29	0.2	1.06	0.76	0.18	0.34	0.26	0.21	1.51	1047.23	468.79	0.28	1.29
ENSG00000101210	EEF1A2	eukaryotic translation elongation factor 1 alpha 2 [Source:HGNC Symbol;Acc:HGNC:3192]	0.38375	211.744	0.0032996	-8.24349	9.71634e-09	6.244e-06	down	0.38	0.62	0.01	0.17	0.48	0.31	0.53	0.57	0.12	0.02	0.14	33.01	1186.9	473.28	0.37	0.11
ENSG00000120729	MYOT	myotilin [Source:HGNC Symbol;Acc:HGNC:12399]	0.105	161.025	0.000921772	-10.0833	9.64542e-09	6.244e-06	down	0	0.38	0.19	0	0.04	0.09	0	0.14	0.83	0	0.63	7.91	940.14	338.17	0.32	0.2
ENSG00000182676	PPP1R27	protein phosphatase 1 regulatory subunit 27 [Source:HGNC Symbol;Acc:HGNC:16813]	0.01375	61.0775	0.000282548	-11.7892	1.08938e-08	6.8062e-06	down	0	0.07	0.04	0	0	0	0	0	0	0.43	0	34.23	226.65	226.49	0.11	0.71
ENSG00000070182	SPTB	spectrin beta, erythrocytic [Source:HGNC Symbol;Acc:HGNC:11274]	0.66	18.1487	0.0232736	-5.42516	1.28587e-08	7.81668e-06	down	0.29	0.4	0.59	1	0.93	0.14	0.43	1.5	0.49	0.45	0.22	3.12	38.64	48	0.66	53.61
ENSG00000108515	ENO3	enolase 3 [Source:HGNC Symbol;Acc:HGNC:3354]	7.2825	394.539	0.0152117	-6.03867	1.92264e-08	1.138e-05	down	4.54	9.03	9.72	3.34	5.69	11.17	10.01	4.76	5.49	5.12	6.82	19.27	1919.97	1181.69	6.57	11.38
ENSG00000124701	APOBEC2	apolipoprotein B mRNA editing enzyme catalytic subunit 2 [Source:HGNC Symbol;Acc:HGNC:605]	0.055	58.1487	0.00197632	-8.98297	2.39881e-08	1.38343e-05	down	0.05	0.06	0.11	0	0.05	0.05	0	0.12	0.12	0.06	0.06	6.46	288.72	168.79	0	0.98
ENSG00000130595	TNNT3	troponin T3, fast skeletal type [Source:HGNC Symbol;Acc:HGNC:11950]	6.70375	651.374	0.0156338	-5.99919	3.28985e-08	1.84988e-05	down	1.64	6.19	3.3	12.25	3.92	1.3	0.64	24.39	4.3	4.61	3.18	165.69	2663	2293.34	31.91	44.96
ENSG00000239474	KLHL41	kelch like family member 41 [Source:HGNC Symbol;Acc:HGNC:16905]	1.23625	356.995	0.00720172	-7.11744	3.71788e-08	2.03958e-05	down	0.32	1.2	1.66	0.87	0.66	1.43	0.32	3.43	1.51	1	0.87	64.92	1839.86	946.4	0.92	0.48
ENSG00000179862	CITED4	Cbp/p300 interacting transactivator with Glu/Asp rich carboxy-terminal domain 4 [Source:HGNC Symbol;Acc:HGNC:18696]	0.6025	3.78875	0.123303	-3.01972	4.3909e-08	2.35143e-05	down	0.81	0.73	0.78	0.63	0.92	0.31	0.4	0.24	3.69	0.38	0.98	1.64	7.91	4.65	2.82	8.24
ENSG00000163827	LRRC2	leucine rich repeat containing 2 [Source:HGNC Symbol;Acc:HGNC:14676]	0.95375	11.7238	0.0419116	-4.57651	5.6719e-08	2.9668e-05	down	0.2	1.34	1.92	0.72	1.54	1.23	0.18	0.5	9.36	0.75	0.13	1.5	45.91	29.52	1.4	5.22
ENSG00000160867	FGFR4	fibroblast growth factor receptor 4 [Source:HGNC Symbol;Acc:HGNC:3691]	0.13	1.725	0.0266752	-5.22836	5.90556e-08	3.01881e-05	down	0.07	0.23	0.31	0.14	0	0.2	0.09	0	1.09	0	1.11	0.27	3.38	4.49	2.83	0.63
ENSG00000160678	S100A1	S100 calcium binding protein A1 [Source:HGNC Symbol;Acc:HGNC:10486]	1.51125	275.954	0.0340298	-4.87706	6.14619e-08	3.072e-05	down	0.57	2.04	2.3	0.98	0.52	1.29	1.44	2.95	1.66	1.03	1.62	85.15	1229.56	815.24	16.08	57.29
ENSG00000131730	CKMT2	creatine kinase, mitochondrial 2 [Source:HGNC Symbol;Acc:HGNC:1996]	0.9025	65.3462	0.0218961	-5.51318	7.13416e-08	3.48829e-05	down	0.72	1.09	1.5	0.23	0.7	1.02	0.63	1.33	4.56	0.8	1.16	4.05	321.61	187.29	2.86	0.44
ENSG00000087085	ACHE	acetylcholinesterase (Cartwright blood group) [Source:HGNC Symbol;Acc:HGNC:108]	0.73625	12.2775	0.0359111	-4.79943	8.04615e-08	3.85051e-05	down	0.61	1.84	0.48	0.26	0.99	0.35	0.53	0.83	0.3	0.68	0.23	1.62	62.81	20.67	1.56	10.35
ENSG00000177791	MYOZ1	myozenin 1 [Source:HGNC Symbol;Acc:HGNC:13752]	0.57125	341.991	0.00607459	-7.363	1.10435e-07	5.17482e-05	down	0.88	0.59	0.79	0.4	0.2	0.69	0.54	0.48	0.39	0.3	0.99	42.03	2130.18	561.71	0.33	0
ENSG00000105048	TNNT1	troponin T1, slow skeletal type [Source:HGNC Symbol;Acc:HGNC:11948]	3.13375	1426.42	0.00579838	-7.43013	1.35849e-07	6.23574e-05	down	4.82	7.22	1.13	0	0.69	1.22	9.46	0.53	0.22	1.8	4.26	130.56	9212.57	2058.25	2.24	1.49
ENSG00000227827	PKD1P2	polycystin 1, transient receptor potential channel interacting pseudogene 2 [Source:HGNC Symbol;Acc:HGNC:30066]	0.09875	1.8175	0.0454923	-4.45824	1.41417e-07	6.36152e-05	down	0.12	0.13	0.12	0.06	0.13	0.1	0.07	0.06	0.17	3.89	0.14	0	2.02	5.82	0.05	2.45
ENSG00000064886	CHI3L2	chitinase 3 like 2 [Source:HGNC Symbol;Acc:HGNC:1933]	32.8425	437.064	0.0596987	-4.06616	1.50798e-07	6.65049e-05	down	18.58	68.72	57.85	26.59	12.4	32.23	8.37	38	2171.61	214.57	7.67	587.6	3.72	75	190.06	246.28
ENSG00000036448	MYOM2	myomesin 2 [Source:HGNC Symbol;Acc:HGNC:7614]	4.41375	53.8775	0.0303751	-5.04097	1.60554e-07	6.91939e-05	down	6.11	0.52	4.15	3.77	2.17	2.68	3.53	12.38	2.07	2.99	3.4	12.84	241.97	146.83	16.47	4.45
ENSG00000159251	ACTC1	actin alpha cardiac muscle 1 [Source:HGNC Symbol;Acc:HGNC:143]	1.24125	190.431	0.0219343	-5.51067	1.65924e-07	6.91939e-05	down	0	0.39	1.51	4.14	0.98	1.41	0.31	1.19	11.73	2.55	0.07	53.16	185.85	1260.75	6.71	2.63
ENSG00000171714	ANO5	anoctamin 5 [Source:HGNC Symbol;Acc:HGNC:27337]	0.715	6.1575	0.0440992	-4.5031	1.66124e-07	6.91939e-05	down	1.18	0.23	0.92	0.44	1.39	0.53	0.81	0.22	0.83	0.46	0.61	0.85	32.68	8.03	0.24	5.56
ENSG00000112782	CLIC5	chloride intracellular channel 5 [Source:HGNC Symbol;Acc:HGNC:13517]	2.45875	24.8912	0.0599666	-4.0597	1.69252e-07	6.92149e-05	down	1.83	5.76	3.49	2.13	3.04	0.64	0.69	2.09	7.41	1.88	1.26	3.56	94.13	49.3	3.55	38.04
ENSG00000012817	KDM5D	lysine demethylase 5D [Source:HGNC Symbol;Acc:HGNC:11115]	11.2287	0.25	230.923	7.85127	1.80984e-07	7.26909e-05	up	31.5	0	0.08	0.26	25.49	32.17	0.33	0	0.26	0.25	0.26	0	0.1	0.11	0.46	0.56
ENSG00000123689	G0S2	G0/G1 switch 2 [Source:HGNC Symbol;Acc:HGNC:30229]	11.2562	188.129	0.0385074	-4.69872	1.84541e-07	7.28194e-05	down	9.85	52.79	8.05	7.07	1.21	6.77	1.12	3.19	462.84	3.85	2.24	123.03	743.07	72.66	58.24	39.1
ENSG00000187193	MT1X	metallothionein 1X [Source:HGNC Symbol;Acc:HGNC:7405]	53.7512	331.173	0.134682	-2.89237	1.94299e-07	7.5348e-05	down	41.73	79.39	124.34	28.76	39.74	48.82	22.27	44.96	349.69	115.7	24.04	581.95	618.57	385.46	393.04	180.93
ENSG00000108823	SGCA	sarcoglycan alpha [Source:HGNC Symbol;Acc:HGNC:10805]	2.01125	31.1313	0.0379532	-4.71964	2.37099e-07	9.0387e-05	down	0.09	8.48	0.53	1.64	1.97	0.87	0.5	2.01	9.65	0.55	1.02	13.93	120.8	75.98	15.04	12.08
ENSG00000155657	TTN	titin [Source:HGNC Symbol;Acc:HGNC:12403]	0.425	55.445	0.013803	-6.17887	2.41669e-07	9.05938e-05	down	0.33	0.52	0.49	0.45	0.22	0.34	0.2	0.85	0.24	0.37	0.1	2.88	306.7	132.46	0.06	0.75
ENSG00000047597	XK	X-linked Kx blood group [Source:HGNC Symbol;Acc:HGNC:12811]	0.08125	1.69375	0.0407649	-4.61653	3.28907e-07	0.000121275	down	0.07	0.13	0.05	0.05	0.04	0.04	0.04	0.23	0.15	0.15	0	0.13	2.47	1	0.47	9.18
ENSG00000197893	NRAP	nebulin related anchoring protein [Source:HGNC Symbol;Acc:HGNC:7988]	0.01375	99.53	0.000275845	-11.8239	3.70319e-07	0.000134342	down	0	0	0	0.02	0.01	0.01	0	0.07	0.08	0	0	6.93	480.8	308.39	0	0.04
ENSG00000124743	KLHL31	kelch like family member 31 [Source:HGNC Symbol;Acc:HGNC:21353]	0.11625	7.7675	0.0239721	-5.3825	4.03886e-07	0.000144194	down	0.01	0.7	0.09	0.06	0	0.02	0	0.05	0.76	0.04	0.13	0.46	48.46	12	0.19	0.1
ENSG00000163395	IGFN1	immunoglobulin like and fibronectin type III domain containing 1 [Source:HGNC Symbol;Acc:HGNC:24607]	0.22875	70.025	0.00592621	-7.39867	4.41485e-07	0.000155154	down	0.08	0.15	0.05	0.22	0	0.48	0.26	0.59	0.22	0.01	0.13	3.23	78.55	477.94	0.1	0.02
ENSG00000143318	CASQ1	calsequestrin 1 [Source:HGNC Symbol;Acc:HGNC:1512]	0.355	193.512	0.00771692	-7.01776	4.60736e-07	0.000159429	down	0.88	0.62	0.14	0.39	0.04	0.12	0.23	0.42	0.13	0.2	0.44	6.3	1263.47	277.03	0.42	0.11
ENSG00000068976	PYGM	glycogen phosphorylase, muscle associated [Source:HGNC Symbol;Acc:HGNC:9726]	2.13875	210.941	0.0253619	-5.30119	6.34006e-07	0.000216062	down	0.76	5.59	1.47	2.98	1.57	0.72	0.41	3.61	3.66	1.06	0.52	6.29	1245.75	424.26	2.34	3.65
ENSG00000092054	MYH7	myosin heavy chain 7 [Source:HGNC Symbol;Acc:HGNC:7577]	0.0025	558.55	3.54276e-05	-14.7848	6.65866e-07	0.000223532	down	0	0	0	0	0.02	0	0	0	0	0	0	7.96	3915.45	544.98	0	0.01
ENSG00000161896	IP6K3	inositol hexakisphosphate kinase 3 [Source:HGNC Symbol;Acc:HGNC:17269]	0.135	7.05	0.0115157	-6.44026	6.95012e-07	0.000229886	down	0.09	0.04	0.25	0	0.06	0.46	0.14	0.04	0.79	0.03	0	3.96	42.18	8.59	0.16	0.69
ENSG00000129170	CSRP3	cysteine and glycine rich protein 3 [Source:HGNC Symbol;Acc:HGNC:2472]	0.01625	213.705	3.65296e-05	-14.7406	7.18864e-07	0.000234329	down	0	0	0	0	0	0	0	0.13	0	0	0	71.65	448.06	1189.93	0	0
ENSG00000163126	ANKRD23	ankyrin repeat domain 23 [Source:HGNC Symbol;Acc:HGNC:24470]	1.925	129.79	0.0150223	-6.05675	7.36948e-07	0.000236792	down	1.21	3.07	4.06	2.64	1.76	1.05	0.43	1.18	2.34	1.85	0.8	7.79	706.21	316.02	0.22	3.09
ENSG00000102683	SGCG	sarcoglycan gamma [Source:HGNC Symbol;Acc:HGNC:10809]	0.24	11.8525	0.0320097	-4.96535	8.58965e-07	0.000272111	down	0.11	1.1	0.19	0.06	0.05	0.3	0.05	0.06	2	0.18	0.06	2.78	51.95	36.18	0.56	1.11
ENSG00000116717	GADD45A	growth arrest and DNA damage inducible alpha [Source:HGNC Symbol;Acc:HGNC:4095]	25.5538	45.0175	0.4543	-1.13828	8.74919e-07	0.000273315	down	19.77	37.54	44.11	21.64	28.03	19.85	12.71	20.78	38.08	60.63	24.52	39.52	30.77	47.35	56.2	63.07
ENSG00000165912	PACSIN3	protein kinase C and casein kinase substrate in neurons 3 [Source:HGNC Symbol;Acc:HGNC:8572]	3.40625	34.92	0.0750987	-3.73507	1.08428e-06	0.000334077	down	1.36	2.64	3.96	9.73	2.73	1.19	1.05	4.59	8.66	8.12	3.35	12.96	134.19	104.62	4.41	3.05
ENSG00000136842	TMOD1	tropomodulin 1 [Source:HGNC Symbol;Acc:HGNC:11871]	3.34	21.1438	0.104419	-3.25954	1.15759e-06	0.000351844	down	0.79	7.91	6.96	0.65	3.17	1.35	3.18	2.71	15.04	3.01	0.96	13.41	60.06	35.88	15.55	25.24
ENSG00000163157	TMOD4	tropomodulin 4 [Source:HGNC Symbol;Acc:HGNC:11874]	0.865	118.105	0.0118684	-6.39673	1.36354e-06	0.000408918	down	0.57	1.8	1	0	0.94	0.78	1.11	0.72	0.2	0.36	0.47	14.25	686.21	239.92	0.68	2.75
ENSG00000224940	PRRT4	proline rich transmembrane protein 4 [Source:HGNC Symbol;Acc:HGNC:37280]	0.12375	2.60625	0.0376318	-4.7319	1.45378e-06	0.000430243	down	0.14	0.35	0.08	0.16	0	0	0.04	0.22	2.26	0.12	0	0.59	0.64	1.18	0.56	15.5
ENSG00000141161	UNC45B	unc-45 myosin chaperone B [Source:HGNC Symbol;Acc:HGNC:14304]	0.0275	9.4725	0.00525553	-7.57195	1.58886e-06	0.000464111	down	0.01	0	0.07	0.02	0.03	0.09	0	0	0.11	0.03	0.06	1.04	51.38	23.02	0	0.14
ENSG00000029534	ANK1	ankyrin 1 [Source:HGNC Symbol;Acc:HGNC:492]	3.11125	53.355	0.0838933	-3.5753	1.71905e-06	0.000495704	down	1.74	2.97	3.32	2.8	5.68	1.92	3.5	2.96	3.17	2.66	2.48	4.88	280.68	66	3.21	63.76
ENSG00000158008	EXTL1	exostosin like glycosyltransferase 1 [Source:HGNC Symbol;Acc:HGNC:3515]	0.05375	1.36875	0.0193209	-5.6937	1.78079e-06	0.000507007	down	0.04	0.12	0.01	0.02	0	0.13	0.11	0	0.22	0.04	0.16	0	2.33	2.8	0	5.4
ENSG00000119125	GDA	guanine deaminase [Source:HGNC Symbol;Acc:HGNC:4212]	0.04	0.51875	0.0214746	-5.54122	1.80608e-06	0.00050778	down	0.1	0	0.11	0	0.01	0.07	0.03	0	0.03	0.02	0.04	0.08	2.14	1.42	0.39	0.03
ENSG00000133055	MYBPH	myosin binding protein H [Source:HGNC Symbol;Acc:HGNC:7552]	0.65125	14.8775	0.0336334	-4.89396	2.04875e-06	0.000561958	down	1.36	0.15	0.94	0.21	0.18	0.47	1.85	0.05	1.04	0.31	0.3	14.32	22.52	79.67	0.59	0.27
ENSG00000166317	SYNPO2L	synaptopodin 2 like [Source:HGNC Symbol;Acc:HGNC:23532]	0.075	12.35	0.0148088	-6.0774	2.03667e-06	0.000561958	down	0.04	0.05	0.18	0.08	0.04	0.06	0.05	0.1	0.05	0.04	0.07	1.12	69.35	28.11	0.01	0.05
ENSG00000100678	SLC8A3	solute carrier family 8 member A3 [Source:HGNC Symbol;Acc:HGNC:11070]	0.27125	2.91	0.0588193	-4.08757	2.20625e-06	0.000587109	down	0.12	0.28	0.29	0.59	0.33	0.14	0.22	0.2	0.33	0.2	0.14	0.26	10.36	3.43	0.21	8.35
ENSG00000138347	MYPN	myopalladin [Source:HGNC Symbol;Acc:HGNC:23246]	0.28125	22.94	0.0165075	-5.92073	2.18959e-06	0.000587109	down	0.2	0.92	0.54	0.06	0.08	0.27	0.02	0.16	1.58	0.08	0	2.04	125.87	51.83	0.2	1.92
ENSG00000160808	MYL3	myosin light chain 3 [Source:HGNC Symbol;Acc:HGNC:7584]	1.74125	314.962	0.0390332	-4.67915	2.21876e-06	0.000587109	down	1.49	0.69	1.99	5.22	0.47	1.33	0.05	2.69	6.8	1.7	1.81	4.47	2188.19	310.08	3.58	3.07
ENSG00000164708	PGAM2	phosphoglycerate mutase 2 [Source:HGNC Symbol;Acc:HGNC:8889]	0.54375	114.567	0.00950485	-6.71712	2.42359e-06	0.000633854	down	0.19	1.45	0	1.7	0.45	0.15	0.17	0.24	0	0.24	0.32	5.88	548.26	353.95	6.17	1.72
ENSG00000165887	ANKRD2	ankyrin repeat domain 2 [Source:HGNC Symbol;Acc:HGNC:495]	0.2775	173.692	0.0145502	-6.10281	2.70017e-06	0.000697469	down	0.47	0.43	0.19	0.54	0.15	0	0.26	0.18	0.18	0.35	0.09	1.96	1264.74	121.1	0.77	0.35
ENSG00000168530	MYL1	myosin light chain 1 [Source:HGNC Symbol;Acc:HGNC:7582]	0.03375	2184.05	6.3273e-05	-13.9481	2.72885e-06	0.000697469	down	0	0	0	0	0	0	0	0.27	0	0	0	85.4	13834.4	3552.48	0.13	0
ENSG00000161281	COX7A1	cytochrome c oxidase subunit 7A1 [Source:HGNC Symbol;Acc:HGNC:2287]	58.7437	567.999	0.0834255	-3.58337	2.953e-06	0.00074628	down	43.2	112.18	32.16	62.34	65.09	32.23	27.44	95.31	101	40.28	91.34	386.12	2791.32	924.59	163.09	46.25
ENSG00000138100	TRIM54	tripartite motif containing 54 [Source:HGNC Symbol;Acc:HGNC:16008]	0.20375	65.7875	0.00546297	-7.5161	3.29582e-06	0.000823662	down	0.21	0	0.06	0	0.04	0.08	1.19	0.05	0.05	0.25	0.28	5.46	325.89	194.25	0	0.12
ENSG00000130598	TNNI2	troponin I2, fast skeletal type [Source:HGNC Symbol;Acc:HGNC:11946]	6.80375	369.877	0.0220173	-5.50522	3.67767e-06	0.000902698	down	10.62	3.76	3.95	1.01	3.65	11.93	17.71	1.8	2.84	2.84	18.15	65.18	1460.41	1401.65	2.4	5.55
ENSG00000158571	PFKFB1	6-phosphofructo-2-kinase/fructose-2,6-biphosphatase 1 [Source:HGNC Symbol;Acc:HGNC:8872]	0.37875	4.84	0.0415293	-4.58973	3.69234e-06	0.000902698	down	0.08	1.69	0.23	0.31	0.23	0.3	0.11	0.08	5.22	0.09	0.19	0.57	24.47	7.6	0.21	0.37
ENSG00000102554	KLF5	Kruppel like factor 5 [Source:HGNC Symbol;Acc:HGNC:6349]	2.11125	5.7775	0.213119	-2.23027	3.90542e-06	0.000944523	down	1.18	6.02	2.02	1.21	2.31	1.35	0.93	1.87	4.46	1.7	1.14	2.59	7.17	11.54	6.79	10.83
ENSG00000127824	TUBA4A	tubulin alpha 4a [Source:HGNC Symbol;Acc:HGNC:12407]	16.2825	60.8088	0.133954	-2.90019	4.14e-06	0.000990604	down	19	20.29	20.82	14.79	13.17	19.06	7.41	15.72	20.58	12.69	5.64	29.61	196.27	71.95	35.89	113.84
ENSG00000185269	NOTUM	notum, palmitoleoyl-protein carboxylesterase [Source:HGNC Symbol;Acc:HGNC:27106]	0.0375	0.57125	0.0263878	-5.24398	4.52108e-06	0.0010704	down	0	0.13	0.07	0.1	0	0	0	0	0.33	0.31	0	0.61	2.33	0.1	0.21	0.68
ENSG00000180209	MYL11	myosin light chain 11 [Source:HGNC Symbol;Acc:HGNC:29824]	0.38875	1288.06	0.000420682	-11.215	4.73846e-06	0.00111018	down	0.86	0.71	0.42	0.92	0	0	0	0.2	0	0	2.42	49.33	8482.36	1770.39	0	0
ENSG00000111245	MYL2	myosin light chain 2 [Source:HGNC Symbol;Acc:HGNC:7583]	0.055	3542.46	8.0874e-05	-13.594	4.84228e-06	0.00111604	down	0	0	0.24	0	0	0	0	0.2	0	0	0.16	52.68	24748.7	3537.57	0.54	0
ENSG00000176399	DMRTA1	DMRT like family A1 [Source:HGNC Symbol;Acc:HGNC:13826]	0.0125	0.18125	0.0494499	-4.33789	4.8627e-06	0.00111604	down	0.01	0.01	0.02	0	0	0.04	0	0.02	0.17	0.02	0.09	0.03	0.71	0.21	0.02	0.2
ENSG00000065361	ERBB3	erb-b2 receptor tyrosine kinase 3 [Source:HGNC Symbol;Acc:HGNC:3431]	0.2275	1.5525	0.109025	-3.19727	5.05007e-06	0.00114734	down	0.3	0.19	0.19	0.32	0.05	0.25	0.19	0.33	1.76	0.15	0.14	0.96	0.82	1.49	5.84	1.26
ENSG00000105737	GRIK5	glutamate ionotropic receptor kainate type subunit 5 [Source:HGNC Symbol;Acc:HGNC:4583]	0.07875	0.8875	0.0809774	-3.62634	5.68257e-06	0.00127812	down	0.02	0.21	0.05	0.08	0.06	0.04	0.08	0.09	2.1	0	0	0.4	0.44	0.46	1.74	1.96
ENSG00000164309	CMYA5	cardiomyopathy associated 5 [Source:HGNC Symbol;Acc:HGNC:14305]	2.34375	114.424	0.0444919	-4.49031	5.9721e-06	0.00132995	down	0.64	3.53	1.3	2.67	3.76	1.6	0.46	4.79	2.97	2.28	1.16	11.77	561.24	330.92	2.21	2.84
ENSG00000072954	TMEM38A	transmembrane protein 38A [Source:HGNC Symbol;Acc:HGNC:28462]	1.13	18.595	0.0723905	-3.78805	6.19038e-06	0.00136504	down	0.66	2.21	1.13	0.85	1.03	0.78	1.16	1.22	1.41	1.12	0.56	4.21	86.92	49.2	1.12	4.22
ENSG00000104369	JPH1	junctophilin 1 [Source:HGNC Symbol;Acc:HGNC:14201]	0.07875	11.785	0.00944065	-6.7269	6.35197e-06	0.0013741	down	0.05	0.04	0.28	0	0.14	0	0	0.12	0.37	0.08	0	1.06	67.89	24.23	0.04	0.61
ENSG00000166823	MESP1	mesoderm posterior bHLH transcription factor 1 [Source:HGNC Symbol;Acc:HGNC:29658]	0.24125	1.55875	0.0782886	-3.67505	6.35366e-06	0.0013741	down	0.36	0.69	0.06	0.3	0.08	0.16	0.08	0.2	3	0.19	0.19	2.13	4.41	2.18	0.2	0.17
ENSG00000109846	CRYAB	crystallin alpha B [Source:HGNC Symbol;Acc:HGNC:2389]	83.9638	844.528	0.0812208	-3.62201	8.05606e-06	0.00172568	down	25.16	204.01	37.57	63.45	114.49	29.04	26.5	171.49	403.73	68.56	38.41	356.76	4040.35	1610.84	173.92	63.65
ENSG00000135902	CHRND	cholinergic receptor nicotinic delta subunit [Source:HGNC Symbol;Acc:HGNC:1965]	0.00625	11.5638	0.000410443	-11.2505	9.43486e-06	0.00200197	down	0	0	0	0	0	0.05	0	0	0.06	0	0	3.76	31.95	56.72	0.02	0
ENSG00000212864	RNF208	ring finger protein 208 [Source:HGNC Symbol;Acc:HGNC:25420]	0.53875	1.73875	0.244231	-2.03368	9.78197e-06	0.00205623	down	0.51	1.03	0.52	0.57	0.23	0.46	0.72	0.27	1.96	1.07	1.52	0.34	3.9	1.47	2.26	1.39
ENSG00000078295	ADCY2	adenylate cyclase 2 [Source:HGNC Symbol;Acc:HGNC:233]	0.74875	8.36625	0.109491	-3.19111	1.01582e-05	0.00209613	down	0.11	1.15	1.1	0.87	1.09	1.2	0.02	0.45	1.94	1.57	0.02	2.25	40.63	15.11	1.97	3.44
ENSG00000170381	SEMA3E	semaphorin 3E [Source:HGNC Symbol;Acc:HGNC:10727]	0.83	3.615	0.139451	-2.84217	1.01346e-05	0.00209613	down	0.06	0.94	1.52	0.63	1.88	0.98	0.38	0.25	6.24	0.39	0.69	3.5	0.25	1.33	3	13.52
ENSG00000079393	DUSP13	dual specificity phosphatase 13 [Source:HGNC Symbol;Acc:HGNC:19681]	0.2075	28.68	0.0134258	-6.21885	1.05033e-05	0.00214765	down	0.27	0	0.22	0	0.18	0.39	0.38	0.22	0	0.25	0.4	2.29	148.58	74.82	0.11	2.99
ENSG00000163092	XIRP2	xin actin binding repeat containing 2 [Source:HGNC Symbol;Acc:HGNC:14303]	0.01125	132.176	0.000116763	-13.0641	1.06811e-05	0.00216431	down	0	0.03	0.02	0	0	0	0	0.04	0	0	0	9.89	693.49	353.9	0	0.13
ENSG00000186335	SLC36A2	solute carrier family 36 member 2 [Source:HGNC Symbol;Acc:HGNC:18762]	0.0075	5.51	0.00392559	-7.99288	1.13332e-05	0.00226379	down	0	0	0.04	0	0	0.02	0	0	0.31	0	0	0.4	29.54	12.36	0.05	1.42
ENSG00000248746	ACTN3	actinin alpha 3 [Source:HGNC Symbol;Acc:HGNC:165]	0.0875	56.8612	0.0143142	-6.12641	1.13733e-05	0.00226379	down	0.03	0.18	0.06	0	0.03	0.08	0.13	0.19	0.14	0.03	0	0.19	417.95	36.19	0.2	0.19
ENSG00000133315	MACROD1	mono-ADP ribosylhydrolase 1 [Source:HGNC Symbol;Acc:HGNC:29598]	5.355	22.065	0.162813	-2.61872	1.16281e-05	0.00227425	down	2.41	7.62	4.56	6.98	4.11	5.35	4.19	7.62	13.93	5.36	6.53	13.56	73.85	43.85	11.8	7.64
ENSG00000183023	SLC8A1	solute carrier family 8 member A1 [Source:HGNC Symbol;Acc:HGNC:11068]	11.21	4.62875	2.0799	1.05651	1.16215e-05	0.00227425	up	10.4	14.19	11.06	8.16	18.09	10.04	6.34	11.4	5.2	8.85	5.77	1.64	1.7	4.98	2.96	5.93
ENSG00000185437	SH3BGR	SH3 domain binding glutamate rich protein [Source:HGNC Symbol;Acc:HGNC:10822]	1.58875	57.7437	0.0873446	-3.51714	1.17792e-05	0.00228395	down	1.45	1.88	2.42	2.3	0.56	1.63	0.94	1.53	2.79	3.09	2.16	5.97	368.19	74.29	2.29	3.17
ENSG00000172399	MYOZ2	myozenin 2 [Source:HGNC Symbol;Acc:HGNC:1330]	0.22	23.7787	0.0321562	-4.95876	1.20166e-05	0.00229573	down	0.06	0.38	0.09	0.22	0.12	0.09	0.06	0.74	0.07	0.11	0.03	2.24	147.71	39.73	0.22	0.12
ENSG00000178568	ERBB4	erb-b2 receptor tyrosine kinase 4 [Source:HGNC Symbol;Acc:HGNC:3432]	0.00375	0.30625	0.0230203	-5.44095	1.20441e-05	0.00229573	down	0	0.01	0	0	0	0.02	0	0	0.06	0.01	0	0.32	1.48	0.34	0.01	0.23
ENSG00000141449	GREB1L	GREB1 like retinoic acid receptor coactivator [Source:HGNC Symbol;Acc:HGNC:31042]	0.05875	0.8975	0.0632317	-3.98321	1.2987e-05	0.00245168	down	0.28	0.04	0.01	0.04	0.02	0.05	0.02	0.01	0.29	0.05	0	0.02	4.65	1.97	0.16	0.04
ENSG00000154358	OBSCN	obscurin, cytoskeletal calmodulin and titin-interacting RhoGEF [Source:HGNC Symbol;Acc:HGNC:15719]	4.2	54.0675	0.0634731	-3.97771	1.30803e-05	0.00245168	down	1.96	7.24	8.18	4.22	2.11	3.05	3.88	2.96	5.56	3.22	2.27	4.36	239.24	165.73	5.04	7.12
ENSG00000167701	GPT	glutamic--pyruvic transaminase [Source:HGNC Symbol;Acc:HGNC:4552]	0.6975	4.54125	0.108657	-3.20215	1.32765e-05	0.00246789	down	0.52	2.01	1.04	0.31	0.35	0.68	0.38	0.29	8.49	0.25	0.25	1.83	12.4	10.32	0.58	2.21
ENSG00000196091	MYBPC1	myosin binding protein C1 [Source:HGNC Symbol;Acc:HGNC:7549]	0.04875	639.381	0.000153152	-12.6727	1.38828e-05	0.00255945	down	0	0	0.03	0	0.04	0	0	0.32	0	0	0	46.44	3844.15	1224.46	0	0
ENSG00000106992	AK1	adenylate kinase 1 [Source:HGNC Symbol;Acc:HGNC:361]	64.8275	164.729	0.251429	-1.99178	1.42912e-05	0.00261332	down	27.03	110.33	79.86	86.64	41.72	38.74	42.43	91.87	99.74	65.1	67.7	307.13	294.49	176.19	184.09	123.39
ENSG00000127324	TSPAN8	tetraspanin 8 [Source:HGNC Symbol;Acc:HGNC:11855]	0.125	8.04	0.00952338	-6.71431	1.45586e-05	0.00264074	down	0	0.79	0	0.07	0.05	0	0	0.09	0	0.21	0	7.34	28.03	4.17	24.01	0.56
ENSG00000113396	SLC27A6	solute carrier family 27 member 6 [Source:HGNC Symbol;Acc:HGNC:11000]	0.0125	0.34375	0.0232378	-5.42738	1.48955e-05	0.00268023	down	0	0.07	0.03	0	0	0	0	0	0.12	0	0	0.27	1.05	0.76	0.17	0.38
ENSG00000239839	DEFA3	defensin alpha 3 [Source:HGNC Symbol;Acc:HGNC:2762]	1.56625	51.3237	0.010335	-6.59632	1.50645e-05	0.00268913	down	0.52	0	11.67	0.34	0	0	0	0	1.98	21.43	0	161.8	4.64	5.23	180.44	35.07
ENSG00000118804	STBD1	starch binding domain 1 [Source:HGNC Symbol;Acc:HGNC:24854]	8.02	30.5263	0.179048	-2.48158	1.55199e-05	0.00274862	down	4.86	11.78	8.35	6.05	9.75	7.41	6.39	9.57	30.08	7.84	3.11	18.41	113.12	37.62	13.73	20.3
ENSG00000272573	MUSTN1	musculoskeletal, embryonic nuclear protein 1 [Source:HGNC Symbol;Acc:HGNC:22144]	8.2575	453.791	0.0396614	-4.65612	1.59437e-05	0.0028016	down	0.54	17.38	3.31	5.67	11.44	3.34	1.27	23.11	35.95	0.79	0.31	79.39	2153.59	1295.79	61.32	3.19
ENSG00000168907	PLA2G4F	phospholipase A2 group IVF [Source:HGNC Symbol;Acc:HGNC:27396]	0.00375	0.40625	0.0111839	-6.48243	1.70957e-05	0.00298075	down	0	0	0.02	0	0	0.01	0	0	0	0	0	0.03	1.18	1.62	0.1	0.32
ENSG00000133454	MYO18B	myosin XVIIIB [Source:HGNC Symbol;Acc:HGNC:18150]	0.01125	13.5663	0.00147708	-9.40304	1.90312e-05	0.00326755	down	0	0.04	0	0.01	0	0.04	0	0	0.02	0	0	3.59	73.31	31.53	0	0.08
ENSG00000164161	HHIP	hedgehog interacting protein [Source:HGNC Symbol;Acc:HGNC:14866]	0.17625	2.08	0.0347625	-4.84632	1.88881e-05	0.00326755	down	0	0.47	0.68	0.06	0.13	0.06	0.01	0	1.67	0.05	0.01	0.67	3.39	0.04	0.79	10.02
ENSG00000198336	MYL4	myosin light chain 4 [Source:HGNC Symbol;Acc:HGNC:7585]	1.1	10.2075	0.0987819	-3.33961	1.9331e-05	0.00329388	down	0.89	0.25	1.35	3.28	1.03	0.47	0.35	1.18	1.18	1.7	0.96	8.49	0.96	3.12	18.88	46.37
ENSG00000133878	DUSP26	dual specificity phosphatase 26 [Source:HGNC Symbol;Acc:HGNC:28161]	0.05125	18.6588	0.00577337	-7.43637	1.99597e-05	0.00337544	down	0.15	0.07	0	0	0.05	0	0.14	0	0.11	0	0	2.04	102.38	44.07	0.11	0.56
ENSG00000187837	H1-2	H1.2 linker histone, cluster member [Source:HGNC Symbol;Acc:HGNC:4716]	7.34125	31.3412	0.180759	-2.46786	2.02934e-05	0.00340625	down	10.02	7.04	5.86	6.75	11.68	6.43	7.53	3.42	69.75	3.96	4.73	35.3	82	28.36	12.41	14.22
ENSG00000135447	PPP1R1A	protein phosphatase 1 regulatory inhibitor subunit 1A [Source:HGNC Symbol;Acc:HGNC:9286]	2.79625	30.175	0.0517694	-4.27176	2.06083e-05	0.00343349	down	0.19	16.2	3.28	0.85	0.15	0.81	0.57	0.32	41.07	0.64	1.17	16.66	131.13	45.75	2.22	2.76
ENSG00000164821	DEFA4	defensin alpha 4 [Source:HGNC Symbol;Acc:HGNC:2763]	0.575	91.1725	0.0129205	-6.27419	2.10881e-05	0.0034876	down	0	0	0.28	0	0	0	0	4.32	0	1.53	0	12.83	0.38	0.22	28.5	685.92
ENSG00000132819	RBM38	RNA binding motif protein 38 [Source:HGNC Symbol;Acc:HGNC:15818]	8.0925	31.6887	0.19376	-2.36766	2.22599e-05	0.00363493	down	9.73	7.5	9.8	6.69	6.49	9.58	7.97	6.98	8.75	6.23	10.12	7.48	71.26	26.69	12.59	110.39
ENSG00000163884	KLF15	Kruppel like factor 15 [Source:HGNC Symbol;Acc:HGNC:14536]	0.28875	2.7025	0.0716683	-3.80252	2.23022e-05	0.00363493	down	0.09	1.34	0.62	0.07	0.06	0.06	0.03	0.04	7.12	0.18	0	1.07	5.75	4.49	1.43	1.58
ENSG00000101892	ATP1B4	ATPase Na+/K+ transporting family member beta 4 [Source:HGNC Symbol;Acc:HGNC:808]	0.075	7.58125	0.0144192	-6.11586	2.38761e-05	0.00386347	down	0.43	0.03	0.02	0	0.02	0.07	0.03	0	0.02	0.02	0.3	0.18	47.41	12.7	0	0.02
ENSG00000224982	TMEM233	transmembrane protein 233 [Source:HGNC Symbol;Acc:HGNC:37219]	0.53375	3	0.113637	-3.13749	2.47225e-05	0.00397185	down	0.48	0.68	1.01	0.9	0.11	0.21	0.2	0.68	1.93	1.36	0.19	1.13	11.57	6.75	0.82	0.25
ENSG00000170807	LMOD2	leiomodin 2 [Source:HGNC Symbol;Acc:HGNC:6648]	0.01875	115.927	0.000249207	-11.9704	2.59766e-05	0.00414374	down	0	0.11	0	0	0	0	0	0.04	0	0	0.04	9.55	688.45	229.35	0	0.03
ENSG00000078328	RBFOX1	RNA binding fox-1 homolog 1 [Source:HGNC Symbol;Acc:HGNC:18222]	0.07375	6.95875	0.00996694	-6.64863	2.76274e-05	0.00419862	down	0	0.03	0.33	0	0.12	0.11	0	0	0.14	0.67	0	0.99	42.51	11.12	0.2	0.04
ENSG00000110693	SOX6	SRY-box transcription factor 6 [Source:HGNC Symbol;Acc:HGNC:16421]	0.45625	3.11	0.105281	-3.24769	2.69914e-05	0.00419862	down	0.21	0.92	0.59	0.31	0.69	0.03	0.19	0.71	1.54	0.73	0.11	0.26	5.39	2.79	1.03	13.03
ENSG00000116661	FBXO2	F-box protein 2 [Source:HGNC Symbol;Acc:HGNC:13581]	0.3125	2.54125	0.082395	-3.6013	2.75286e-05	0.00419862	down	0.04	0.15	0.82	0.32	0.47	0.14	0.07	0.49	0.55	0.16	0	0.95	0.89	0.67	11.44	5.67
ENSG00000166123	GPT2	glutamic--pyruvic transaminase 2 [Source:HGNC Symbol;Acc:HGNC:18062]	3.2775	11.1613	0.188813	-2.40497	2.73052e-05	0.00419862	down	2.33	8.78	2.95	4.29	1.89	1.64	1.59	2.75	16.24	6.45	2.91	3.53	37.71	12.78	3.24	6.43
ENSG00000171033	PKIA	cAMP-dependent protein kinase inhibitor alpha [Source:HGNC Symbol;Acc:HGNC:9017]	1.83625	148.206	0.0742009	-3.75242	2.75703e-05	0.00419862	down	1.79	1.57	3.06	1.24	1.53	1.25	0.71	3.54	0.69	3.54	1.18	6.07	856.85	313.56	2.58	1.18
ENSG00000198838	RYR3	ryanodine receptor 3 [Source:HGNC Symbol;Acc:HGNC:10485]	1.06125	6.2025	0.073449	-3.76711	2.71134e-05	0.00419862	down	0.43	3.09	1.24	2.21	0.43	0.48	0.09	0.52	7.82	1.16	0.08	1.28	29.03	7.29	1.65	1.31
ENSG00000205364	MT1M	metallothionein 1M [Source:HGNC Symbol;Acc:HGNC:14296]	13.6913	73.4437	0.179515	-2.47782	2.7294e-05	0.00419862	down	10	15.97	28.08	8.27	16.17	8.57	3.59	18.88	164.29	15.95	5.5	142.95	10.12	60.62	91.14	96.98
ENSG00000134020	PEBP4	phosphatidylethanolamine binding protein 4 [Source:HGNC Symbol;Acc:HGNC:28319]	0.2925	18.2987	0.040712	-4.6184	2.80515e-05	0.00423446	down	0.22	0.47	0.16	0.37	0.48	0	0	0.64	0.37	0.73	0.48	1.75	106.9	34.85	0.44	0.87
ENSG00000099954	CECR2	CECR2 histone acetyl-lysine reader [Source:HGNC Symbol;Acc:HGNC:1840]	0.03	1.4	0.0716754	-3.80238	2.84613e-05	0.00426207	down	0.01	0.05	0.02	0.03	0.01	0.04	0.07	0.01	0.08	0.04	0.02	0.08	8.38	2.32	0.06	0.22
ENSG00000182512	GLRX5	glutaredoxin 5 [Source:HGNC Symbol;Acc:HGNC:20134]	21.4825	39.3787	0.423306	-1.24023	2.86134e-05	0.00426207	down	21.12	24.26	22.69	26.54	20.14	15.15	18.83	23.13	29.57	25.42	24.24	50.57	54.31	35.9	38.45	56.57
ENSG00000127325	BEST3	bestrophin 3 [Source:HGNC Symbol;Acc:HGNC:17105]	0.0125	4.97625	0.00247191	-8.66016	2.90203e-05	0.00429424	down	0	0	0	0	0.05	0	0	0.05	0	0	0	3.08	18.13	17.34	0.04	1.22
ENSG00000230082	PRRT3-AS1	PRRT3 antisense RNA 1 [Source:HGNC Symbol;Acc:HGNC:41151]	0.4275	3.11875	0.0960517	-3.38004	2.9666e-05	0.0043611	down	0.2	0.61	0.57	0.46	0.37	0.35	0.19	0.67	2.27	1.22	0.48	5.2	9.36	5.78	0.64	0
ENSG00000099957	P2RX6	purinergic receptor P2X 6 [Source:HGNC Symbol;Acc:HGNC:8538]	0.25625	4.0175	0.109899	-3.18575	2.99738e-05	0.00437774	down	0.28	0.79	0.32	0.07	0.15	0.25	0.12	0.07	0.92	0.25	0.1	0.52	16.49	7.74	0.74	5.38
ENSG00000010282	HHATL	hedgehog acyltransferase like [Source:HGNC Symbol;Acc:HGNC:13242]	0.05125	29.2375	0.00223006	-8.8087	3.16326e-05	0.00456078	down	0	0.1	0.22	0	0	0.09	0	0	0.19	0	0.26	4.21	153.6	75.35	0	0.29
ENSG00000103942	HOMER2	homer scaffold protein 2 [Source:HGNC Symbol;Acc:HGNC:17513]	3.205	14.165	0.134342	-2.89602	3.26999e-05	0.00465498	down	2.99	5.46	2.5	2.84	3.43	2.73	2.97	2.72	2.45	8.65	4.2	3.96	56.42	22.51	1.95	13.18
ENSG00000168333	PPDPFL	pancreatic progenitor cell differentiation and proliferation factor like [Source:HGNC Symbol;Acc:HGNC:31745]	0.08875	55.1512	0.00351821	-8.15094	3.25622e-05	0.00465498	down	0	0.28	0	0.15	0	0	0.13	0.15	0.31	0	0	5.77	333.75	100.2	1.18	0
ENSG00000104848	KCNA7	potassium voltage-gated channel subfamily A member 7 [Source:HGNC Symbol;Acc:HGNC:6226]	0.065	4.0725	0.0348296	-4.84354	3.31556e-05	0.00469017	down	0.02	0.12	0.24	0.04	0.04	0.02	0.02	0.02	0.08	0.03	0.06	0.26	21.96	10.08	0	0.11
ENSG00000112039	FANCE	FA complementation group E [Source:HGNC Symbol;Acc:HGNC:3586]	2.47125	3.72375	0.4991	-1.0026	3.39486e-05	0.00474358	down	2.65	3.37	2.64	3.25	2.28	1.3	2.37	1.91	3.83	3.33	3.11	2.51	5.29	3.69	3.22	4.81
ENSG00000256940	PPP1R14B-AS1	PPP1R14B antisense RNA 1 [Source:HGNC Symbol;Acc:HGNC:54233]	1.44875	5.70625	0.195961	-2.35136	3.3955e-05	0.00474358	down	1.08	2.1	1.66	1.18	2.02	1.17	0.69	1.69	5.8	3.47	2.38	16.55	4.13	8.85	2.93	1.54
ENSG00000105357	MYH14	myosin heavy chain 14 [Source:HGNC Symbol;Acc:HGNC:23212]	0.14375	5.76125	0.0143338	-6.12443	3.44108e-05	0.0047472	down	0	0.86	0.06	0.02	0.11	0.03	0	0.07	5.47	0	0	2.08	18.85	17.96	1.18	0.55
ENSG00000122367	LDB3	LIM domain binding 3 [Source:HGNC Symbol;Acc:HGNC:15710]	2.18	140.833	0.0576711	-4.11601	3.46141e-05	0.0047472	down	0.38	5.86	1.76	2.16	1.59	0.59	0.72	4.38	2.23	0.89	1.18	6.48	864.25	249.43	0.93	1.27
ENSG00000130433	CACNG6	calcium voltage-gated channel auxiliary subunit gamma 6 [Source:HGNC Symbol;Acc:HGNC:13625]	0.02	3.855	0.00844984	-6.88686	3.45634e-05	0.0047472	down	0.05	0	0.04	0.04	0.03	0	0	0	0.06	0.12	0	0.47	18.99	11.02	0.12	0.06
ENSG00000187715	KBTBD12	kelch repeat and BTB domain containing 12 [Source:HGNC Symbol;Acc:HGNC:25731]	0.21125	3.4525	0.103319	-3.27482	3.53067e-05	0.00481284	down	0.08	0.32	0.15	0.14	0.2	0.09	0.22	0.49	0.14	0.17	0.3	0.71	17.84	7.21	0.47	0.78
ENSG00000185739	SRL	sarcalumenin [Source:HGNC Symbol;Acc:HGNC:11295]	1.0025	35.5325	0.061945	-4.01287	3.83684e-05	0.00519868	down	0.39	2.07	0.8	2.29	0.6	0.2	0.42	1.25	1.41	0.5	0.44	2.26	202.62	76.03	0.75	0.25
ENSG00000134716	CYP2J2	cytochrome P450 family 2 subfamily J member 2 [Source:HGNC Symbol;Acc:HGNC:2634]	0.0325	3.47375	0.0181632	-5.78283	4.14229e-05	0.00554574	down	0	0	0.09	0	0.13	0	0.04	0	0.2	0	0	0.63	16.81	9.63	0.35	0.17
ENSG00000289515	-	novel transcript	1.16625	5.63875	0.144763	-2.78824	4.20468e-05	0.00559595	down	0.32	2.31	1.84	0.73	1.2	0.42	1.07	1.44	3.26	1.17	1.49	2.87	22.92	9.68	1.53	2.19
ENSG00000165410	CFL2	cofilin 2 [Source:HGNC Symbol;Acc:HGNC:1875]	23.4062	108.983	0.137372	-2.86384	4.2537e-05	0.00562789	down	12.29	37.85	22.83	34.62	19.89	11.56	12.31	35.9	38.66	38.09	11.24	41.9	494.73	209.23	24.41	13.6
ENSG00000149328	GLB1L2	galactosidase beta 1 like 2 [Source:HGNC Symbol;Acc:HGNC:25129]	0.365	0.86625	0.270696	-1.88525	4.34429e-05	0.00571414	down	0.14	0.87	0.42	0.23	0.24	0.5	0.41	0.11	2.24	0.4	0.29	0.76	0.33	0.58	1.34	0.99
ENSG00000035664	DAPK2	death associated protein kinase 2 [Source:HGNC Symbol;Acc:HGNC:2675]	4.86875	12.54	0.183616	-2.44523	4.44075e-05	0.00580504	down	2.4	9.93	9.11	3.68	4.93	2.88	2.87	3.15	15.65	3.08	2.44	2.4	31.21	14.65	7.11	23.78
ENSG00000148344	PTGES	prostaglandin E synthase [Source:HGNC Symbol;Acc:HGNC:9599]	11.9787	33.6562	0.302693	-1.72407	4.46502e-05	0.00580504	down	4.59	12.52	18.83	14.39	13.29	10.29	11.26	10.66	87.06	29.9	11.83	34.36	3.3	18.13	45.81	38.86
ENSG00000172508	CARNS1	carnosine synthase 1 [Source:HGNC Symbol;Acc:HGNC:29268]	0.34625	5.29875	0.120612	-3.05155	4.50452e-05	0.00582274	down	0.3	0.65	0.6	0.23	0.08	0.28	0.18	0.45	0.99	0.26	0.35	0.41	25.18	13.49	0.62	1.09
ENSG00000145777	TSLP	thymic stromal lymphopoietin [Source:HGNC Symbol;Acc:HGNC:30743]	0.11625	0.51	0.165305	-2.5968	4.90779e-05	0.00630777	down	0.07	0.15	0	0.12	0.23	0.19	0.13	0.04	0.79	0.11	0.07	0.61	0.93	0.71	0.43	0.43
ENSG00000167476	JSRP1	junctional sarcoplasmic reticulum protein 1 [Source:HGNC Symbol;Acc:HGNC:24963]	1.01125	18.6825	0.0577435	-4.1142	5.02137e-05	0.00641708	down	4.33	0.38	0.36	0.91	0.13	0.25	0.92	0.81	0.74	0	0.47	4.19	95.86	45.91	0.45	1.84
ENSG00000169271	HSPB3	heat shock protein family B (small) member 3 [Source:HGNC Symbol;Acc:HGNC:5248]	0.03875	25.2862	0.00107188	-9.86564	5.08935e-05	0.00646721	down	0	0	0	0	0.16	0.15	0	0	0	0	0	12.55	129.55	59.92	0.27	0
ENSG00000166592	RRAD	RRAD, Ras related glycolysis inhibitor and calcium channel regulator [Source:HGNC Symbol;Acc:HGNC:10446]	4.37	30.2875	0.0938389	-3.41367	5.21677e-05	0.00659188	down	1.59	8.13	1.9	5.42	5.83	1.87	2.1	8.12	1.61	4.07	3.22	27.79	111.58	89.39	3.7	0.94
ENSG00000264920	SP2-DT	SP2 divergent transcript [Source:HGNC Symbol;Acc:HGNC:55330]	4.1725	21.4838	0.175699	-2.50882	5.38228e-05	0.00676303	down	4.57	3.55	3.39	5.36	3.87	3.45	6.17	3.02	6	5.32	16.25	8.54	86.31	43.15	2.78	3.52
ENSG00000237943	PRKCQ-AS1	PRKCQ antisense RNA 1 [Source:HGNC Symbol;Acc:HGNC:44689]	1.775	8.1375	0.11259	-3.15085	5.51146e-05	0.00688688	down	1.92	1.91	2.29	2.78	1.83	1.3	1.12	1.05	0.49	0.92	0.48	2.58	31.12	18.1	3.9	7.51
ENSG00000112175	BMP5	bone morphogenetic protein 5 [Source:HGNC Symbol;Acc:HGNC:1072]	0.43625	4.52625	0.0607589	-4.04076	5.71713e-05	0.0071044	down	0	0.91	0.6	1.31	0.06	0.13	0	0.48	2.46	1.2	0	6.24	10.97	11.39	1.39	2.56
ENSG00000163833	FBXO40	F-box protein 40 [Source:HGNC Symbol;Acc:HGNC:29816]	0.02125	6.20125	0.00770023	-7.02088	6.27193e-05	0.00775101	down	0	0.1	0.05	0	0	0.01	0.01	0	0.01	0.02	0.01	0.12	34.06	15.34	0	0.05
ENSG00000053438	NNAT	neuronatin [Source:HGNC Symbol;Acc:HGNC:7860]	2.4875	9.88375	0.188179	-2.40982	6.52341e-05	0.00797416	down	1.94	4.98	4.35	2.42	0.57	2.11	2.75	0.78	43.55	2.44	1.98	8.14	10.41	7.36	3.08	2.11
ENSG00000206172	HBA1	hemoglobin subunit alpha 1 [Source:HGNC Symbol;Acc:HGNC:4823]	269.967	7126	0.0349974	-4.83661	6.51351e-05	0.00797416	down	85.12	27.54	366.02	58.72	117.22	11.05	45.43	1448.64	58.66	489.48	6.96	6647.86	282.2	1070.15	23588.8	24863.9
ENSG00000138772	ANXA3	annexin A3 [Source:HGNC Symbol;Acc:HGNC:541]	3.1475	23.2263	0.107593	-3.21634	6.57657e-05	0.00799568	down	1.14	10.02	1.64	1.4	2.89	1.35	0.45	6.29	4.8	1.6	1.7	4.62	10.24	9.21	16.29	137.35
ENSG00000152078	TLCD4	TLC domain containing 4 [Source:HGNC Symbol;Acc:HGNC:26477]	0.35125	2.46125	0.108324	-3.20658	6.68438e-05	0.00808307	down	0.14	0.55	0.04	0.32	0.63	0.11	0.05	0.97	1.04	0.28	0.05	0.64	6.09	2.76	0.75	8.08
ENSG00000101400	SNTA1	syntrophin alpha 1 [Source:HGNC Symbol;Acc:HGNC:11167]	7.47875	20.5637	0.255585	-1.96812	6.84657e-05	0.00823492	down	5.59	11.65	6.61	9.58	7.27	4.58	5.34	9.21	17.97	7.16	7.53	15.72	55.97	41.02	11.83	7.31
ENSG00000101342	TLDC2	TBC/LysM-associated domain containing 2 [Source:HGNC Symbol;Acc:HGNC:16112]	6.91375	1.92375	3.17359	1.66611	7.02609e-05	0.0084059	up	4.81	8.98	9.45	4.09	5.27	8.18	10.02	4.51	2.25	2.62	2.64	0	0.65	2.36	2.11	2.76
ENSG00000089250	NOS1	nitric oxide synthase 1 [Source:HGNC Symbol;Acc:HGNC:7872]	0.00875	1.9025	0.00803623	-6.95926	7.18552e-05	0.00855114	down	0.02	0	0	0.02	0.01	0.01	0	0.01	0.02	0.01	0	0.24	10.08	4.85	0	0.02
ENSG00000111046	MYF6	myogenic factor 6 [Source:HGNC Symbol;Acc:HGNC:7566]	0.02	42.5037	0.000281008	-11.7971	7.29463e-05	0.0086353	down	0	0	0	0.16	0	0	0	0	0	0	0	20.04	214.82	105.17	0	0
ENSG00000186205	MTARC1	mitochondrial amidoxime reducing component 1 [Source:HGNC Symbol;Acc:HGNC:26189]	2.72625	11.0188	0.179106	-2.48112	7.33897e-05	0.00864231	down	0.91	10.76	2.77	1.23	0.52	1.68	1.11	2.83	30.45	1.53	0.96	9.76	10.34	6.21	7.14	21.76
ENSG00000006016	CRLF1	cytokine receptor like factor 1 [Source:HGNC Symbol;Acc:HGNC:2364]	37.5237	140.442	0.214925	-2.21809	7.49678e-05	0.00873667	down	9.2	55.21	53.94	24.66	41.48	35.84	36.51	43.35	229.37	35.23	31.77	234.97	13.31	52.05	204.43	322.41
ENSG00000176728	TTTY14	testis-specific transcript, Y-linked 14 [Source:HGNC Symbol;Acc:HGNC:18495]	0.82875	0.03125	20.6629	4.36897	7.46882e-05	0.00873667	up	1.94	0.03	0.11	0.04	1.36	3.12	0	0.03	0.04	0.08	0	0	0.03	0.03	0.03	0.04
ENSG00000166405	RIC3	RIC3 acetylcholine receptor chaperone [Source:HGNC Symbol;Acc:HGNC:30338]	0.5275	2.1375	0.140876	-2.8275	8.27245e-05	0.00940971	down	0.74	1.17	0.22	0.31	0.38	0.6	0.19	0.61	3.13	0.34	0.16	0.27	4.84	1.84	0.77	5.75
ENSG00000181856	SLC2A4	solute carrier family 2 member 4 [Source:HGNC Symbol;Acc:HGNC:11009]	0.9475	11.5075	0.126726	-2.98022	8.28349e-05	0.00940971	down	0.27	4.04	0.22	0.53	1.17	0.26	0.3	0.79	2.65	0.34	0.22	1.28	63.07	20.32	1.67	2.51
ENSG00000244734	HBB	hemoglobin subunit beta [Source:HGNC Symbol;Acc:HGNC:4827]	765.158	18095.9	0.0379432	-4.72002	8.27954e-05	0.00940971	down	247.55	88.75	1069.05	183.07	244.23	35.58	133.08	4119.95	215.91	1754.36	10.52	20673.2	948.85	2859.79	59524.5	58779.7
ENSG00000267060	PTGES3L	prostaglandin E synthase 3 like [Source:HGNC Symbol;Acc:HGNC:43943]	0.23875	8.18375	0.0541106	-4.20794	8.17032e-05	0.00940971	down	0.58	0.15	0.4	0.07	0.22	0.06	0.24	0.19	0.43	0.07	0	1.64	38.72	23.75	0.23	0.63
ENSG00000055955	ITIH4	inter-alpha-trypsin inhibitor heavy chain 4 [Source:HGNC Symbol;Acc:HGNC:6169]	6.525	23.5512	0.147568	-2.76054	8.49862e-05	0.00946292	down	5.35	10.27	10.27	2.57	7.39	6.74	6.01	3.6	8.08	3.99	2.84	5.32	89.6	57.29	10.62	10.67
ENSG00000067646	ZFY	zinc finger protein Y-linked [Source:HGNC Symbol;Acc:HGNC:12870]	2.3575	0.0475	368.901	8.52709	8.49218e-05	0.00946292	up	6.11	0	0	0	5.68	7.05	0	0.02	0.15	0	0	0	0	0.13	0.1	0
ENSG00000122180	MYOG	myogenin [Source:HGNC Symbol;Acc:HGNC:7612]	0.005	11.0038	0.000301914	-11.6936	8.44176e-05	0.00946292	down	0	0	0.04	0	0	0	0	0	0	0	0	9.56	45.75	32.72	0	0
ENSG00000266872	-	novel transcript, antisense to KSR1	1.56375	4.6075	0.263437	-1.92447	8.47374e-05	0.00946292	down	1.03	3.12	2.1	1.1	0.4	0.89	2.6	1.27	3.06	4.77	1.93	5.76	4.35	2.74	11.8	2.45
ENSG00000177752	YIPF7	Yip1 domain family member 7 [Source:HGNC Symbol;Acc:HGNC:26825]	0.1325	9.42375	0.0420962	-4.57016	8.58878e-05	0.0095162	down	0.08	0.12	0.1	0.24	0	0	0.11	0.41	0.41	0.04	0	2.23	54.4	17.91	0.34	0.06
ENSG00000129173	E2F8	E2F transcription factor 8 [Source:HGNC Symbol;Acc:HGNC:24727]	1.02875	3.5625	0.248646	-2.00783	8.65444e-05	0.00954194	down	1.41	1.26	1.13	1.27	0.6	1.1	0.82	0.64	1.84	2.58	1.09	1.18	6.23	7.59	0.53	7.46
ENSG00000183873	SCN5A	sodium voltage-gated channel alpha subunit 5 [Source:HGNC Symbol;Acc:HGNC:10593]	0.035	0.25125	0.0772249	-3.69479	8.74165e-05	0.00959108	down	0.01	0.02	0.08	0.07	0	0.01	0.08	0.01	0.08	0.04	0	0.13	0.19	1.27	0.02	0.28
ENSG00000083454	P2RX5	purinergic receptor P2X 5 [Source:HGNC Symbol;Acc:HGNC:8536]	0.70875	3.095	0.13652	-2.87282	8.89134e-05	0.00970796	down	1.47	0.63	1.81	0.21	0.14	0.51	0.45	0.45	0.68	0.32	0.26	0.93	4.99	8.6	1.98	7
ENSG00000133134	BEX2	brain expressed X-linked 2 [Source:HGNC Symbol;Acc:HGNC:30933]	0.2075	1.1275	0.142515	-2.81082	9.01356e-05	0.00979387	down	0.17	0.13	0.34	0.42	0.12	0.22	0.12	0.14	0.39	0.39	0.84	0.09	2.96	1.49	1.66	1.2
ENSG00000145358	DDIT4L	DNA damage inducible transcript 4 like [Source:HGNC Symbol;Acc:HGNC:30555]	4.6875	24.7063	0.112531	-3.1516	9.24931e-05	0.0100017	down	1.39	9.25	0.65	8.62	5.71	2.56	1.78	7.54	4.83	4.82	2.33	14.2	136.76	23.11	7.95	3.65
ENSG00000060138	YBX3	Y-box binding protein 3 [Source:HGNC Symbol;Acc:HGNC:2428]	183.415	421.887	0.289133	-1.7902	9.29995e-05	0.0100083	down	122.15	228.33	168.19	177.59	207.52	163.72	175.98	223.84	350.56	216.48	116.66	286.23	1096.76	776.96	310.79	220.66
ENSG00000198242	RPL23A	ribosomal protein L23a [Source:HGNC Symbol;Acc:HGNC:10317]	384.224	693.558	0.30975	-1.69082	9.41861e-05	0.0100878	down	296.58	424.74	322.86	587.19	280.17	336.74	366.05	459.46	504.86	383.48	423.15	1752.44	577.66	640.28	973.24	293.35
ENSG00000005381	MPO	myeloperoxidase [Source:HGNC Symbol;Acc:HGNC:7218]	0.81125	109.431	0.110562	-3.17708	9.599e-05	0.0102323	down	0.18	0.19	1.54	0.35	0.15	0.3	0.24	3.54	0.6	3.93	0.12	3.85	0.37	0.19	14.98	851.41
ENSG00000166292	TMEM100	transmembrane protein 100 [Source:HGNC Symbol;Acc:HGNC:25607]	7.125	22.7275	0.231492	-2.11097	9.75383e-05	0.0103087	down	1.71	16.62	8.2	6.24	9.89	3.3	3.14	7.9	42.41	5.05	2.45	29.79	6.81	14	32.08	49.23
ENSG00000182759	MAFA	MAF bZIP transcription factor A [Source:HGNC Symbol;Acc:HGNC:23145]	0.00625	1.16875	0.00496239	-7.65475	9.76237e-05	0.0103087	down	0	0	0.02	0	0	0	0.03	0	0	0	0	0.42	5.33	3.48	0.09	0.03
ENSG00000164122	ASB5	ankyrin repeat and SOCS box containing 5 [Source:HGNC Symbol;Acc:HGNC:17180]	0.02875	25.2963	0.000331562	-11.5584	9.89362e-05	0.0103985	down	0	0	0.06	0	0	0.17	0	0	0	0	0	9.22	95.6	97.55	0	0
ENSG00000118729	CASQ2	calsequestrin 2 [Source:HGNC Symbol;Acc:HGNC:1513]	4.62125	37.075	0.0824681	-3.60002	9.98665e-05	0.0104474	down	0.52	9.71	1.49	2.18	5.55	0.98	1.97	14.57	7.62	1.29	1.24	10.73	144.8	120.6	7.99	2.33
ENSG00000050344	NFE2L3	NFE2 like bZIP transcription factor 3 [Source:HGNC Symbol;Acc:HGNC:7783]	11.35	4.1875	2.5996	1.37829	0.000100647	0.0104803	up	12.38	17	13.56	3.41	18.99	12.26	8.49	4.71	1.78	5.65	4.87	2.17	1.58	3.7	8.3	5.45
ENSG00000260592	-	novel transcript, antisense to TMC5	0.03625	2.09	0.0175745	-5.83037	0.000103818	0.0107607	down	0	0	0.11	0	0	0	0	0.18	0	0.17	0	3.38	0	0.16	6.28	6.73
ENSG00000132329	RAMP1	receptor activity modifying protein 1 [Source:HGNC Symbol;Acc:HGNC:9843]	2.21375	11.0862	0.130139	-2.94187	0.000105912	0.0109274	down	4.03	2.25	1.51	3.34	2.17	2.72	0.82	0.87	3.55	0.54	1.02	4.07	48.66	22.88	5.05	2.92
ENSG00000257698	GIHCG	GIHCG inhibitor of miR-200b/200a/429 expression [Source:HGNC Symbol;Acc:HGNC:52649]	3.88375	6.715	0.428629	-1.2222	0.000107414	0.0110317	down	4.02	4.78	4.95	3.86	2.82	3.29	2.18	5.17	4.95	3.81	7.33	8.33	7.73	7.06	8.1	6.41
ENSG00000172350	ABCG4	ATP binding cassette subfamily G member 4 [Source:HGNC Symbol;Acc:HGNC:13884]	0.95875	0.5275	3.27444	1.71125	0.000112828	0.0115351	up	0.27	0.96	1.02	1.51	0.46	1.02	1.67	0.76	0.39	0.89	2.4	0.06	0.03	0.12	0.24	0.09
ENSG00000276085	CCL3L3	C-C motif chemokine ligand 3 like 3 [Source:HGNC Symbol;Acc:HGNC:30554]	38.6337	7.12125	5.56045	2.4752	0.00011381	0.0115829	up	29.82	5.21	15.52	9.28	10.56	116.22	64.96	57.5	8.65	9.51	16.65	1.21	0.37	2.11	6.28	12.19
ENSG00000132429	POPDC3	popeye domain containing 3 [Source:HGNC Symbol;Acc:HGNC:17649]	2.05	15.8125	0.076792	-3.7029	0.000114979	0.0116491	down	2.76	0.29	1.46	4.79	1.93	3.38	1.22	0.57	0.27	9.25	1.67	8.06	73.28	33.42	0.37	0.18
ENSG00000187634	SAMD11	sterile alpha motif domain containing 11 [Source:HGNC Symbol;Acc:HGNC:28706]	3.40125	6.6575	0.31272	-1.67706	0.000117441	0.01174	down	1.48	4.7	7.42	6.88	1.07	2.52	0.93	2.21	19.2	1.68	3.07	5.75	1.46	6.9	7.73	7.47
ENSG00000196218	RYR1	ryanodine receptor 1 [Source:HGNC Symbol;Acc:HGNC:10483]	8.7625	110.237	0.0897656	-3.47769	0.000116926	0.01174	down	12.52	9.67	3.66	3.58	7.99	6.87	20.65	5.16	4.78	3.12	15.16	22.9	553.81	271.92	3.96	6.25
ENSG00000198842	STYXL2	serine/threonine/tyrosine interacting like 2 [Source:HGNC Symbol;Acc:HGNC:25034]	0.2925	7.4325	0.0765892	-3.70672	0.000116955	0.01174	down	0	0.29	0.04	0.66	0.11	0.2	0.39	0.65	0.72	0.24	0.13	2.27	39.3	15.87	0.24	0.69
ENSG00000156219	ART3	ADP-ribosyltransferase 3 (inactive) [Source:HGNC Symbol;Acc:HGNC:725]	0.3175	15.13	0.0205552	-5.60435	0.000118061	0.0117496	down	0	1.2	0.23	0.35	0.45	0	0	0.31	0.6	0	0.28	2.13	81.36	35.29	0.09	1.29
ENSG00000175701	MTLN	mitoregulin [Source:HGNC Symbol;Acc:HGNC:27339]	27.6125	119.915	0.180946	-2.46637	0.000120069	0.0118969	down	19.95	29.39	25.75	35.22	30	26.77	33.84	19.98	44.07	13.52	45.42	99.26	472.09	227.71	41.3	15.95
ENSG00000058404	CAMK2B	calcium/calmodulin dependent protein kinase II beta [Source:HGNC Symbol;Acc:HGNC:1461]	0.545	8.58	0.0689209	-3.85891	0.00012127	0.0119473	down	0.3	0.69	0.61	0.51	0.37	1.36	0.48	0.04	0.09	0.18	1.31	0.96	41.07	24.88	0.03	0.12
ENSG00000205362	MT1A	metallothionein 1A [Source:HGNC Symbol;Acc:HGNC:7393]	1.5175	9.7225	0.140224	-2.83419	0.00012164	0.0119473	down	1.01	2.31	3.7	1.68	0.44	1.18	1.82	0	25.13	2.61	0.7	19.59	1.87	9.3	16.6	1.98
ENSG00000169715	MT1E	metallothionein 1E [Source:HGNC Symbol;Acc:HGNC:7397]	41.2275	116.933	0.292363	-1.77417	0.000132267	0.0129345	down	28.84	61.52	100.45	42.33	27.01	25.65	11.63	32.39	247.36	54.36	34.97	192.91	24.25	102.98	156.51	122.12
ENSG00000184489	PTP4A3	protein tyrosine phosphatase 4A3 [Source:HGNC Symbol;Acc:HGNC:9636]	8.4825	30.9825	0.194301	-2.36363	0.000136288	0.0131562	down	13.43	15.97	11.78	8.37	5.45	2.35	3.41	7.1	16.99	9.12	8.28	10.03	92.36	81.13	25.72	4.23
ENSG00000223802	CERS1	ceramide synthase 1 [Source:HGNC Symbol;Acc:HGNC:14253]	0.135	0.76625	0.0890257	-3.48963	0.000135772	0.0131562	down	0.04	0	0.1	0.61	0.07	0.11	0	0.15	0.6	0.05	0.25	0.42	2.76	1.28	0.59	0.18
ENSG00000246022	ALDH1L1-AS2	ALDH1L1 antisense RNA 2 [Source:HGNC Symbol;Acc:HGNC:42446]	0.01	0.37875	0.0215412	-5.53676	0.000135525	0.0131562	down	0	0.08	0	0	0	0	0	0	1.25	0	0	0.27	0.73	0.64	0	0.14
ENSG00000148677	ANKRD1	ankyrin repeat domain 1 [Source:HGNC Symbol;Acc:HGNC:15819]	0.37375	88.2262	0.0353548	-4.82195	0.000147789	0.014145	down	0.19	0.05	0.03	0	0	2.43	0.23	0.06	0.11	0.16	0.05	13.95	358.79	332.6	0.15	0
ENSG00000158856	DMTN	dematin actin binding protein [Source:HGNC Symbol;Acc:HGNC:3382]	7.41375	26.8813	0.195017	-2.35833	0.000147161	0.014145	down	2.75	8.79	22.89	7.07	4.07	1.96	4.02	7.76	16.2	6.45	4.09	9.42	32.82	22.93	15.95	107.19
ENSG00000216866	RPS2P55	ribosomal protein S2 pseudogene 55 [Source:HGNC Symbol;Acc:HGNC:36140]	0.9825	2.5325	0.319627	-1.64554	0.000148619	0.0141642	down	0.92	0.5	0.7	1.23	0.91	1.59	1.47	0.54	4.44	0.76	2.84	2.95	1.95	3.46	0.93	2.93
ENSG00000003249	DBNDD1	dysbindin domain containing 1 [Source:HGNC Symbol;Acc:HGNC:28455]	0.295	3.03375	0.175842	-2.50765	0.000151579	0.0143853	down	0.2	0.74	0.37	0.11	0.19	0.27	0.05	0.43	0.61	0.31	0.47	0.39	14.53	5.59	0.78	1.59
ENSG00000039537	C6	complement C6 [Source:HGNC Symbol;Acc:HGNC:1339]	1.17625	7.09375	0.0712301	-3.81137	0.000154375	0.0145891	down	0.13	5.31	0.16	2.37	0.46	0.31	0	0.67	16.13	1.31	0	17.02	2.49	9.33	8.09	2.38
ENSG00000124171	PARD6B	par-6 family cell polarity regulator beta [Source:HGNC Symbol;Acc:HGNC:16245]	0.06875	0.345	0.163112	-2.61606	0.0001558	0.0146622	down	0.07	0.12	0.02	0.09	0.11	0.03	0.05	0.06	0.13	0.1	0.07	0.12	0.21	0.08	1.67	0.38
ENSG00000187486	KCNJ11	potassium inwardly rectifying channel subfamily J member 11 [Source:HGNC Symbol;Acc:HGNC:6257]	0.235	3.69625	0.0624537	-4.00107	0.000157428	0.0147536	down	1.12	0.14	0.12	0.14	0.09	0.06	0.13	0.08	0.06	0.05	0.06	0.69	18.58	9.95	0	0.18
ENSG00000162409	PRKAA2	protein kinase AMP-activated catalytic subunit alpha 2 [Source:HGNC Symbol;Acc:HGNC:9377]	0.17375	4.05	0.088137	-3.50411	0.000158879	0.0147639	down	0.05	0.26	0.06	0.17	0.23	0.07	0.16	0.39	0.39	0.18	0	0.82	20.37	10.05	0.25	0.34
ENSG00000248713	C4orf54	chromosome 4 open reading frame 54 [Source:HGNC Symbol;Acc:HGNC:27741]	0.005	2.42125	0.00361606	-8.11136	0.000159506	0.0147639	down	0	0	0.01	0.01	0.01	0	0	0.01	0	0	0	0.31	10.76	8.26	0.01	0.03
ENSG00000116981	NT5C1A	5'-nucleotidase, cytosolic IA [Source:HGNC Symbol;Acc:HGNC:17819]	0.06625	2.605	0.0912154	-3.45458	0.000160228	0.0147699	down	0.05	0.11	0.07	0.15	0.03	0.03	0.01	0.08	0.06	0.05	0.05	0.19	16.57	3.79	0.08	0.05
ENSG00000119938	PPP1R3C	protein phosphatase 1 regulatory subunit 3C [Source:HGNC Symbol;Acc:HGNC:9293]	13.625	53.0538	0.169616	-2.55965	0.00016184	0.0148576	down	3.23	23.68	6.76	17.28	26.19	4.34	3.06	24.46	8.33	23.83	13.15	23.1	214.9	68.49	42.43	30.2
ENSG00000140795	MYLK3	myosin light chain kinase 3 [Source:HGNC Symbol;Acc:HGNC:29826]	0.105	2.8175	0.110864	-3.17313	0.000166853	0.0152447	down	0.04	0.21	0.41	0.05	0.02	0.06	0.03	0.02	0.09	0.48	0.16	0.05	17.71	3.68	0.05	0.32
ENSG00000170681	CAVIN4	caveolae associated protein 4 [Source:HGNC Symbol;Acc:HGNC:33742]	0.7275	24.085	0.0860313	-3.53899	0.000167909	0.0152447	down	1.2	0.61	0.89	0.41	0.37	1.28	0.52	0.54	0.4	0.66	0.3	2.45	139.05	49.21	0.26	0.35
ENSG00000230262	LINC02603	long intergenic non-protein coding RNA 2603 [Source:HGNC Symbol;Acc:HGNC:37186]	0.98	0.18875	4.74979	2.24786	0.00016809	0.0152447	up	0.62	1.75	1.4	0.32	0.57	1.08	1.13	0.97	0.25	0.71	0.22	0	0.25	0	0.08	0
ENSG00000070371	CLTCL1	clathrin heavy chain like 1 [Source:HGNC Symbol;Acc:HGNC:2093]	3.6825	12.035	0.191612	-2.38374	0.000170748	0.0153618	down	1.87	8	4.42	4.72	2.67	2.65	1.35	3.78	3.94	4.13	2.21	3.82	34.18	24.4	2.96	20.64
ENSG00000116748	AMPD1	adenosine monophosphate deaminase 1 [Source:HGNC Symbol;Acc:HGNC:468]	0.16125	55.3537	0.00412072	-7.92289	0.000170605	0.0153618	down	0.73	0.13	0	0.43	0	0	0	0	0	0	0	4.29	361.46	75.46	0.1	1.52
ENSG00000012223	LTF	lactotransferrin [Source:HGNC Symbol;Acc:HGNC:6720]	4.065	204.72	0.103859	-3.2673	0.000174125	0.0156033	down	0.79	1.47	3.81	1.64	0.79	0.46	0.12	23.44	1.29	8.82	0.8	26.06	1.19	0.35	48.48	1550.77
ENSG00000101306	MYLK2	myosin light chain kinase 2 [Source:HGNC Symbol;Acc:HGNC:16243]	0.1825	30.0888	0.0228417	-5.45219	0.000176336	0.0156539	down	0.07	0	0.66	0.03	0.05	0.19	0.46	0	0.12	0.29	0.12	0.78	206.52	32.77	0	0.11
ENSG00000164093	PITX2	paired like homeodomain 2 [Source:HGNC Symbol;Acc:HGNC:9005]	0.10875	5.22	0.0461253	-4.4383	0.000176778	0.0156539	down	0.18	0	0.33	0.32	0.04	0	0	0	0.28	0	0	0.82	28.86	8.28	2.48	1.04
ENSG00000291097	HLA-L	major histocompatibility complex, class I, L (pseudogene) [Source:HGNC Symbol;Acc:HGNC:4970]	8.13625	2.275	2.65473	1.40857	0.000176627	0.0156539	up	19.63	10.93	3.99	13.23	3.22	3.16	6.24	4.69	2.53	2.18	2.25	0.4	0.75	2.15	1.73	6.21
ENSG00000117115	PADI2	peptidyl arginine deiminase 2 [Source:HGNC Symbol;Acc:HGNC:18341]	2.1675	33.0288	0.135807	-2.88037	0.000180769	0.0159446	down	3.24	0.73	2.94	0.65	1.42	4.07	2.5	1.79	0.91	1.59	2.79	4.93	162.8	69.13	1.82	20.26
ENSG00000141401	IMPA2	inositol monophosphatase 2 [Source:HGNC Symbol;Acc:HGNC:6051]	14.105	32.0887	0.287488	-1.79843	0.000181937	0.0159849	down	10.03	9.42	21.55	25.79	11	10.47	13.29	11.29	37.67	10.35	11.61	37.77	68.27	49.15	12.36	29.53
ENSG00000104812	GYS1	glycogen synthase 1 [Source:HGNC Symbol;Acc:HGNC:4706]	17.1513	37.2238	0.284846	-1.81174	0.000183063	0.0160212	down	22.05	22.25	20.32	15.93	12.02	13.8	13.8	17.04	33.19	24.32	11.78	10.34	97.5	62.43	12.78	45.45
ENSG00000189367	KIAA0408	KIAA0408 [Source:HGNC Symbol;Acc:HGNC:21636]	1.21125	5.01	0.286465	-1.80357	0.000185609	0.0161811	down	1.35	2.21	2.33	1.11	0.74	0.93	0.28	0.74	2.78	4.42	0.48	0.94	20.9	4.39	2.01	4.16
ENSG00000183878	UTY	ubiquitously transcribed tetratricopeptide repeat containing, Y-linked [Source:HGNC Symbol;Acc:HGNC:12638]	2.30125	0.0025	863.808	9.75457	0.000189795	0.0164188	up	6.01	0	0.04	0	6.05	6.31	0	0	0	0	0.02	0	0	0	0	0
ENSG00000188536	HBA2	hemoglobin subunit alpha 2 [Source:HGNC Symbol;Acc:HGNC:4824]	656.043	13161.8	0.0448901	-4.47746	0.000189453	0.0164188	down	294.72	70.42	836.97	125.48	287.89	34.31	110.96	3487.59	262.86	1022.06	11.96	14845.4	704.29	2674.37	51207.7	34565.9
ENSG00000170162	VGLL2	vestigial like family member 2 [Source:HGNC Symbol;Acc:HGNC:20232]	0.005	7.0325	0.000907993	-10.105	0.000191218	0.0164784	down	0	0	0.04	0	0	0	0	0	0.12	0	0	1.05	32.2	22.73	0	0.16
ENSG00000215018	COL28A1	collagen type XXVIII alpha 1 chain [Source:HGNC Symbol;Acc:HGNC:22442]	0.4825	1.16875	0.210542	-2.24782	0.00019456	0.016576	down	0.05	1.39	0.38	0.52	0.54	0.28	0.12	0.58	1.45	0.97	0.58	0.41	2.88	1.02	0.61	1.43
ENSG00000240045	STRIT1	small transmembrane regulator of ion transport 1 [Source:HGNC Symbol;Acc:HGNC:52297]	0.02	196.404	0.00046063	-11.0841	0.000194074	0.016576	down	0	0	0	0	0	0	0	0.16	0	0	0	32.35	1291.06	247.82	0	0
ENSG00000279484	KLHL30-AS1	KLHL30 antisense RNA 1 [Source:HGNC Symbol;Acc:HGNC:31018]	0.04375	0.46625	0.1352	-2.88683	0.000193683	0.016576	down	0	0.08	0.07	0.03	0.1	0.02	0.02	0.03	0.14	0.06	0.03	0.52	0.79	0.37	1.7	0.12
ENSG00000228109	MELTF-AS1	MELTF antisense RNA 1 [Source:HGNC Symbol;Acc:HGNC:40373]	0.845	3.045	0.354841	-1.49475	0.000196098	0.0166439	down	0.84	1.63	1.08	0.58	0.3	0.45	1.02	0.86	2.23	1.7	1.79	1.3	1.82	6.16	7.37	1.99
ENSG00000004776	HSPB6	heat shock protein family B (small) member 6 [Source:HGNC Symbol;Acc:HGNC:26511]	34.8462	158.084	0.146898	-2.76711	0.000200708	0.0168445	down	16.81	67.11	12.8	46.05	32.09	12.75	7.8	83.36	112.38	23.79	27.23	55.14	697.72	255.3	78.26	14.85
ENSG00000187642	PERM1	PPARGC1 and ESRR induced regulator, muscle 1 [Source:HGNC Symbol;Acc:HGNC:28208]	0.07	7.13875	0.00902833	-6.79133	0.000200153	0.0168445	down	0	0.23	0.13	0	0.08	0.03	0.09	0	0	0.22	0.01	0.15	33.12	23.46	0.03	0.12
ENSG00000188176	SMTNL2	smoothelin like 2 [Source:HGNC Symbol;Acc:HGNC:24764]	3	12.2312	0.0980808	-3.34988	0.000199506	0.0168445	down	0.99	2.85	1.94	14.22	1.74	0.56	0.17	1.53	1.14	0.49	2.82	8.21	52.66	24.44	7.92	0.17
ENSG00000139835	GRTP1	growth hormone regulated TBC protein 1 [Source:HGNC Symbol;Acc:HGNC:20310]	0.625	1.9725	0.239907	-2.05945	0.000206264	0.0172307	down	0.84	0.89	0.87	0.28	0.42	0.19	0.38	1.13	4.12	0.72	0.08	0.9	4.44	1.14	1.95	2.43
ENSG00000265142	MIR133A1HG	MIR133A1 host gene [Source:HGNC Symbol;Acc:HGNC:49594]	0.05	13.7438	0.019879	-5.65261	0.000206842	0.0172307	down	0.02	0.02	0.01	0.08	0	0.02	0	0.25	0.07	0.05	0.02	0.11	94.07	15.62	0.01	0
ENSG00000185100	ADSS1	adenylosuccinate synthase 1 [Source:HGNC Symbol;Acc:HGNC:20093]	4.2275	40.32	0.197146	-2.34266	0.000210351	0.0174481	down	2.92	5.51	4.33	5.54	2.25	7.4	3.75	2.12	11.72	3.04	3.2	5.46	196.28	82	8.99	11.87
ENSG00000204060	FOXO6	forkhead box O6 [Source:HGNC Symbol;Acc:HGNC:24814]	0.1425	0.43875	0.232719	-2.10334	0.000211003	0.0174481	down	0.03	0.51	0.17	0.23	0	0.05	0.03	0.12	0.3	0.38	0.44	0.28	0.6	0.77	0.24	0.5
ENSG00000144619	CNTN4	contactin 4 [Source:HGNC Symbol;Acc:HGNC:2174]	0.90125	1.91125	0.228125	-2.1321	0.000214979	0.0176471	down	0.2	1.37	0.13	0.22	0.84	0.41	0.35	3.69	3.7	2.02	0.22	0.7	0.86	3.34	3.53	0.92
ENSG00000144908	ALDH1L1	aldehyde dehydrogenase 1 family member L1 [Source:HGNC Symbol;Acc:HGNC:3978]	0.66875	7.935	0.0419744	-4.57435	0.000214863	0.0176471	down	0.02	4.39	0.16	0.42	0	0.04	0.02	0.3	20.76	0.12	0.13	4.08	19.84	15.75	2.2	0.6
ENSG00000151150	ANK3	ankyrin 3 [Source:HGNC Symbol;Acc:HGNC:494]	3.85625	22.7362	0.156357	-2.67709	0.000219953	0.0179246	down	0.8	6.99	9.51	5.93	1.57	2.11	0.7	3.24	11.03	0.95	2	4.28	80.33	59.89	5.08	18.33
ENSG00000164776	PHKG1	phosphorylase kinase catalytic subunit gamma 1 [Source:HGNC Symbol;Acc:HGNC:8930]	2.02875	24.3025	0.177404	-2.49489	0.000219549	0.0179246	down	0.36	4.79	2.26	0.65	2.01	0.63	1.21	4.32	6.22	2.42	1.88	1.4	130.19	44.99	4.57	2.75
ENSG00000013297	CLDN11	claudin 11 [Source:HGNC Symbol;Acc:HGNC:8514]	1.10125	2.94	0.286724	-1.80227	0.000221467	0.0179828	down	0.5	2.62	1.17	2.36	0.26	0.82	0.47	0.61	5.71	1.61	1.44	1.31	2.77	5.27	3.87	1.54
ENSG00000141750	STAC2	SH3 and cysteine rich domain 2 [Source:HGNC Symbol;Acc:HGNC:23990]	0.8375	2.82375	0.2437	-2.03682	0.000223316	0.0180532	down	0.38	1.36	1.08	1.07	0.63	0.76	0.85	0.57	5.58	0.85	1.52	0.83	0.06	2.28	4.35	7.12
ENSG00000101425	BPI	bactericidal permeability increasing protein [Source:HGNC Symbol;Acc:HGNC:1095]	1.1425	45.97	0.128706	-2.95785	0.000225658	0.0181268	down	0.34	0.49	0.77	0.46	0.88	0.21	0.12	5.87	1.69	1.07	0.29	4.62	0.39	0.33	13.19	346.18
ENSG00000008323	PLEKHG6	pleckstrin homology and RhoGEF domain containing G6 [Source:HGNC Symbol;Acc:HGNC:25562]	0.375	1.84875	0.13009	-2.94242	0.000226941	0.0181538	down	0.3	1.07	0.46	0.08	0.44	0.18	0.34	0.13	9.51	0.26	0.09	1.18	0.35	0.51	2.21	0.68
ENSG00000140986	RPL3L	ribosomal protein L3 like [Source:HGNC Symbol;Acc:HGNC:10351]	0.005	27.7875	0.000568787	-10.7798	0.000227608	0.0181538	down	0	0	0	0	0	0	0	0.04	0	0.04	0	1.4	158.57	62.03	0	0.26
ENSG00000151729	SLC25A4	solute carrier family 25 member 4 [Source:HGNC Symbol;Acc:HGNC:10990]	4.65875	53.7963	0.157489	-2.66668	0.000231326	0.0183851	down	1.82	6.91	4.98	2.46	5.93	4.1	4.57	6.5	6.55	3.7	3.75	9.68	250.49	143.69	8.47	4.04
ENSG00000123080	CDKN2C	cyclin dependent kinase inhibitor 2C [Source:HGNC Symbol;Acc:HGNC:1789]	14.3413	26.3912	0.447982	-1.15849	0.000233064	0.018458	down	13.82	20.36	10.38	18.41	17.34	7.72	10.42	16.28	50.25	19.81	14.41	42.6	12.76	17.63	28.73	24.94
ENSG00000186628	FSD2	fibronectin type III and SPRY domain containing 2 [Source:HGNC Symbol;Acc:HGNC:18024]	0.065	7.70625	0.0578401	-4.11178	0.000239913	0.0189337	down	0.02	0.02	0.09	0.07	0.05	0.05	0.2	0.02	0.23	0.02	0.07	0.19	53.71	7.41	0	0.02
ENSG00000123612	ACVR1C	activin A receptor type 1C [Source:HGNC Symbol;Acc:HGNC:18123]	0.26	1.14125	0.14487	-2.78716	0.000242826	0.0189641	down	0.14	1.12	0.09	0.15	0.19	0.17	0.07	0.15	5.98	0.2	0.05	0.89	0.85	0.46	0.37	0.33
ENSG00000124205	EDN3	endothelin 3 [Source:HGNC Symbol;Acc:HGNC:3178]	0.0175	0.30625	0.0373768	-4.74171	0.000242473	0.0189641	down	0	0	0	0.03	0	0.03	0	0.08	0	0.3	0	0.19	1.37	0.06	0.5	0.03
ENSG00000280323	-	TEC	0.025	1.275	0.013397	-6.22194	0.000241384	0.0189641	down	0	0	0	0	0.04	0	0	0.16	0.15	0	0	0.61	3.34	5.87	0.14	0.09
ENSG00000119929	CUTC	cutC copper transporter [Source:HGNC Symbol;Acc:HGNC:24271]	20.1225	56.2575	0.226695	-2.14118	0.000245419	0.0191002	down	13.94	27.53	20.09	21.56	22.11	17.75	13.33	24.67	24	26.32	10.55	34.88	211.72	95.55	29.57	17.47
ENSG00000167815	PRDX2	peroxiredoxin 2 [Source:HGNC Symbol;Acc:HGNC:9353]	63.4138	139.006	0.360543	-1.47175	0.000247485	0.0191946	down	45.6	87.1	56.6	114.55	50.45	28.09	25.06	99.86	121.48	78.2	50.33	108.38	224.36	128.74	132.06	268.5
ENSG00000077152	UBE2T	ubiquitin conjugating enzyme E2 T [Source:HGNC Symbol;Acc:HGNC:25009]	5.49625	12.6862	0.311139	-1.68437	0.000251428	0.0194334	down	5.84	5.13	6.16	8.58	5.2	4.15	4.2	4.71	7.84	10.67	4.85	37.56	9.9	9.98	5.04	15.65
ENSG00000175920	DOK7	docking protein 7 [Source:HGNC Symbol;Acc:HGNC:26594]	0.05875	1.26625	0.0453413	-4.46303	0.00025319	0.0194458	down	0.24	0	0.03	0.04	0	0.03	0	0.13	0.04	0	0.04	0.22	3.55	5.94	0.09	0.25
ENSG00000231943	PGM5P4-AS1	PGM5P4 antisense RNA 1 [Source:HGNC Symbol;Acc:HGNC:51195]	0.26625	1.50125	0.111874	-3.16005	0.000253318	0.0194458	down	0	0.58	0	0	0.37	0.69	0	0.49	1.93	0.1	0.71	2.93	1.77	3.09	1.34	0.14
ENSG00000172995	ARPP21	cAMP regulated phosphoprotein 21 [Source:HGNC Symbol;Acc:HGNC:16968]	0.0175	7.10875	0.0049964	-7.6449	0.000257717	0.0196494	down	0	0	0	0.1	0	0.04	0	0	0	0	0	1.91	37.12	16.73	0.03	1.08
ENSG00000138670	RASGEF1B	RasGEF domain family member 1B [Source:HGNC Symbol;Acc:HGNC:24881]	36.6863	12.52	2.60966	1.38386	0.000259425	0.0197128	up	24.47	20.64	57.96	9.89	48.97	61.08	39.39	31.09	13.42	21.06	21.72	6.01	2.46	12	9.32	14.17
ENSG00000188803	SHISA6	shisa family member 6 [Source:HGNC Symbol;Acc:HGNC:34491]	0.03125	0.24625	0.080348	-3.63759	0.000262208	0.0198572	down	0	0.07	0	0.07	0.06	0.02	0	0.03	0.43	0	0	0.16	0.45	0.07	0.14	0.72
ENSG00000183230	CTNNA3	catenin alpha 3 [Source:HGNC Symbol;Acc:HGNC:2511]	0.145	0.91	0.0657166	-3.9276	0.000263863	0.0199154	down	0.19	0.11	0.15	0.04	0	0.13	0.01	0.53	0.16	0.31	0	0.3	3.99	2.23	0.14	0.15
ENSG00000107518	ATRNL1	attractin like 1 [Source:HGNC Symbol;Acc:HGNC:29063]	0.17875	0.6075	0.155869	-2.68159	0.000265893	0.0199349	down	0.05	0.05	0.04	0.05	0.3	0.25	0.01	0.68	0.26	1.02	0.19	0.52	0.33	1.64	0.23	0.67
ENSG00000170276	HSPB2	heat shock protein family B (small) member 2 [Source:HGNC Symbol;Acc:HGNC:5247]	13.1088	38.6013	0.246144	-2.02243	0.000265877	0.0199349	down	6.9	20.86	10.64	17.01	17.34	4.83	4.13	23.16	36.05	12.4	12.83	40.6	95.12	76.15	27.5	8.16
ENSG00000256269	HMBS	hydroxymethylbilane synthase [Source:HGNC Symbol;Acc:HGNC:4982]	12.3175	29.9688	0.310484	-1.68741	0.000268384	0.0200548	down	11.35	15.1	13.58	15.77	11.06	10.86	9.78	11.04	17.33	16.69	11.12	19.66	16	12.93	12.5	133.52
ENSG00000176771	NCKAP5	NCK associated protein 5 [Source:HGNC Symbol;Acc:HGNC:29847]	2.42125	1.3	2.20976	1.14389	0.000271059	0.0201876	up	1.54	4.85	2.24	3.9	1.78	1.46	1.91	1.69	0.92	1.52	1.61	0.57	1.42	0.54	1.94	1.88
ENSG00000126218	F10	coagulation factor X [Source:HGNC Symbol;Acc:HGNC:3528]	0.5275	2.435	0.123739	-3.01463	0.000274571	0.0202584	down	0.18	1.94	0.21	0.58	0.06	0.11	0.5	0.64	1.63	0.19	0.2	2.47	7.64	3.57	3.67	0.11
ENSG00000133317	LGALS12	galectin 12 [Source:HGNC Symbol;Acc:HGNC:15788]	0.8075	6.10625	0.0986515	-3.34152	0.000275108	0.0202584	down	0.06	4.75	0.11	0.21	0.24	0.36	0.06	0.67	28.38	0.22	0.11	7.48	1.77	3.33	2.98	4.58
ENSG00000151790	TDO2	tryptophan 2,3-dioxygenase [Source:HGNC Symbol;Acc:HGNC:11708]	7.06125	1.0325	7.19181	2.84635	0.000273368	0.0202584	up	32.63	3.12	1.05	4.7	0.86	9.95	1.68	2.5	0.97	1.88	1.25	0.96	0	0.28	1.36	1.56
ENSG00000164898	FMC1	formation of mitochondrial complex V assembly factor 1 homolog [Source:HGNC Symbol;Acc:HGNC:26946]	3.74375	8.8975	0.273442	-1.87069	0.000275612	0.0202584	down	3.29	7.14	5	2.59	3.76	4.06	2.01	2.1	4.52	8.06	6.13	9.8	20.55	13.97	6.15	2
ENSG00000188338	SLC38A3	solute carrier family 38 member 3 [Source:HGNC Symbol;Acc:HGNC:18044]	0.21	2.16625	0.0564879	-4.14591	0.000278856	0.0204301	down	0	0.4	0.47	0.7	0.11	0	0	0	0.03	1.29	0.06	0.08	8.22	4.5	0.8	2.35
ENSG00000258498	DIO3OS	DIO3 opposite strand upstream RNA [Source:HGNC Symbol;Acc:HGNC:20348]	1.9075	6.70875	0.210625	-2.24725	0.000281102	0.0205277	down	1.05	5.34	1.2	2.89	1.82	0.69	0.38	1.89	13.6	1.11	0.42	2.04	8.06	9.59	11.69	7.16
ENSG00000157502	PWWP3B	PWWP domain containing 3B [Source:HGNC Symbol;Acc:HGNC:26583]	0.0225	1.10625	0.0551637	-4.18014	0.000286453	0.0208508	down	0	0.02	0	0.09	0.02	0	0	0.05	0.33	0.04	0	0.16	6.44	1.77	0.03	0.08
ENSG00000109061	MYH1	myosin heavy chain 1 [Source:HGNC Symbol;Acc:HGNC:7567]	0.06	82.3162	0.00317527	-8.2989	0.000299506	0.0217306	down	0	0.12	0	0	0.11	0.01	0	0.24	0	0.01	0	19.42	548.67	90.42	0	0.01
ENSG00000236882	LINC01554	long intergenic non-protein coding RNA 1554 [Source:HGNC Symbol;Acc:HGNC:24687]	0.1425	0.5475	0.248322	-2.00972	0.000305252	0.0220763	down	0.08	0.25	0.34	0.07	0.17	0.08	0	0.15	1.42	0.48	0.24	0.18	0.15	0.23	0.63	1.05
ENSG00000108551	RASD1	ras related dexamethasone induced 1 [Source:HGNC Symbol;Acc:HGNC:15828]	10.3012	61.7812	0.144359	-2.79227	0.000308995	0.0222754	down	12.29	12.28	14.25	27.07	1.3	3.08	0.24	11.9	242.15	18.17	1.53	38.92	19.83	10.71	117.52	45.42
ENSG00000143365	RORC	RAR related orphan receptor C [Source:HGNC Symbol;Acc:HGNC:10260]	0.4225	6.5525	0.138655	-2.85043	0.000310397	0.022305	down	0.61	0.35	0.67	0.3	0.34	0.35	0.38	0.38	0.42	0.27	0.26	1.06	35.33	13.02	0.27	1.79
ENSG00000275494	-	novel transcript	0.32	1.99	0.122141	-3.03338	0.000313171	0.0224326	down	0.44	0.67	0.58	0.25	0.41	0	0.21	0	1.52	0.22	0.27	1.45	6.75	3.82	0.36	1.53
ENSG00000101850	GPR143	G protein-coupled receptor 143 [Source:HGNC Symbol;Acc:HGNC:20145]	2.69	0.49125	5.27472	2.39909	0.000317197	0.0225772	up	1.73	0.85	3.77	1.23	2.89	4.4	4.35	2.3	0.59	0.35	1.14	0.16	0	0.65	0.85	0.19
ENSG00000168509	HJV	hemojuvelin BMP co-receptor [Source:HGNC Symbol;Acc:HGNC:4887]	0.01	31.2712	0.00059662	-10.7109	0.000316999	0.0225772	down	0	0.08	0	0	0	0	0	0	0.08	0	0	5.59	189.51	54.99	0	0
ENSG00000109084	TMEM97	transmembrane protein 97 [Source:HGNC Symbol;Acc:HGNC:28106]	3.655	4.92125	0.45076	-1.14957	0.00032164	0.0227494	down	2.79	5.93	2.47	5.61	1.09	2.89	4.14	4.32	3.96	7.15	3.22	5.44	5.44	2.52	8.91	2.73
ENSG00000218018	RBM38-AS1	RBM38 antisense RNA 1 [Source:HGNC Symbol;Acc:HGNC:40725]	0.16	0.7625	0.134864	-2.89042	0.000320864	0.0227494	down	0.21	0.05	0.12	0.19	0.22	0.4	0.04	0.05	0.11	0.39	0.86	0.15	2.5	0.75	0.03	1.31
ENSG00000186462	NAP1L2	nucleosome assembly protein 1 like 2 [Source:HGNC Symbol;Acc:HGNC:7638]	0.325	0.96875	0.246813	-2.01851	0.000325418	0.0228728	down	0.19	0.54	0.25	0.4	0.21	0.47	0.28	0.26	1.13	0.07	0.07	1.06	1.38	1.9	1	1.14
ENSG00000198502	HLA-DRB5	major histocompatibility complex, class II, DR beta 5 [Source:HGNC Symbol;Acc:HGNC:4953]	852.67	251.93	2.90991	1.54097	0.000324508	0.0228728	up	942.33	1039.98	1027.42	429.59	987.67	1194.94	989.72	209.71	109.06	312.07	703.34	112.91	89.03	364.53	113.86	210.64
ENSG00000143512	HHIPL2	HHIP like 2 [Source:HGNC Symbol;Acc:HGNC:25842]	1.0375	5.39	0.139179	-2.84499	0.000326736	0.0228939	down	0.12	1.65	1.98	0.98	1.65	0.18	0.82	0.92	3.7	3.34	0.09	3.43	0.18	1.43	16.61	14.34
ENSG00000163993	S100P	S100 calcium binding protein P [Source:HGNC Symbol;Acc:HGNC:10504]	0.60625	22.4688	0.0253727	-5.30058	0.000330033	0.0230531	down	0	0.32	0.82	0.75	0.83	0	0	2.13	0.38	2.82	0	12.14	0	0.35	12.75	151.31
ENSG00000110077	MS4A6A	membrane spanning 4-domains A6A [Source:HGNC Symbol;Acc:HGNC:13375]	495.52	195.655	2.25601	1.17377	0.000335495	0.0232183	up	449.27	434.61	672.91	309.73	747.77	672.2	497.45	180.22	241.3	281.66	290.96	138.74	33.86	200.27	101.49	276.96
ENSG00000156463	SH3RF2	SH3 domain containing ring finger 2 [Source:HGNC Symbol;Acc:HGNC:26299]	0.74875	1.9225	0.194207	-2.36433	0.000335019	0.0232183	down	0.5	2.35	0.37	0.55	0.48	0.55	0.59	0.6	0.63	0.36	0.42	0.38	7.97	2.69	2.51	0.42
ENSG00000164591	MYOZ3	myozenin 3 [Source:HGNC Symbol;Acc:HGNC:18565]	1.19125	14.5125	0.129273	-2.95151	0.00033388	0.0232183	down	1.44	2.26	0.71	1.65	0.93	0.42	0.51	1.61	0.62	2.49	1.09	1.15	73.37	33.7	1.39	2.29
ENSG00000150893	FREM2	FRAS1 related extracellular matrix 2 [Source:HGNC Symbol;Acc:HGNC:25396]	0.00125	0.51375	0.00814657	-6.93959	0.000339042	0.0233919	down	0	0	0	0	0	0	0	0.01	0	0	0.01	0.05	3.08	0.95	0.01	0.01
ENSG00000168754	FAM178B	family with sequence similarity 178 member B [Source:HGNC Symbol;Acc:HGNC:28036]	0.08375	1.605	0.0487449	-4.35861	0.000354106	0.0242822	down	0	0.42	0.25	0	0	0	0	0	0.28	0.48	0.38	0	0.08	1.83	0.46	9.33
ENSG00000260442	ATP2A1-AS1	ATP2A1 antisense RNA 1 [Source:HGNC Symbol;Acc:HGNC:51370]	0.17	2.885	0.049364	-4.3404	0.000353697	0.0242822	down	0.05	0.49	0.16	0	0.23	0.24	0.04	0.15	0	0.36	0	3.02	14.12	5.38	0	0.2
ENSG00000289579	-	novel transcript, sense intronic to PTRF	0.58375	2.78125	0.136812	-2.86974	0.000356346	0.0243615	down	0	1.67	0.63	0.55	0.46	0.31	0.26	0.79	1.3	0.75	0.22	1.01	10.16	6.39	2.29	0.13
ENSG00000100116	GCAT	glycine C-acetyltransferase [Source:HGNC Symbol;Acc:HGNC:4188]	2.785	4.69	0.467265	-1.09769	0.000364601	0.0247006	down	3.17	3.79	3.08	4.01	1.83	2.19	1.57	2.64	5.81	6	3.07	4.71	5.3	4.95	3.73	3.95
ENSG00000165197	VEGFD	vascular endothelial growth factor D [Source:HGNC Symbol;Acc:HGNC:3708]	0.6275	2.32125	0.169633	-2.55951	0.000364005	0.0247006	down	0.12	1.84	0.52	1.29	0.58	0.26	0.27	0.14	7.28	0.42	0.17	2.07	5.17	1.33	1.71	0.42
ENSG00000204219	TCEA3	transcription elongation factor A3 [Source:HGNC Symbol;Acc:HGNC:11615]	16.7987	45.3338	0.236561	-2.07972	0.000364117	0.0247006	down	10.7	27.8	19.16	23.96	12.34	7.09	7.89	25.45	14.68	32.47	12.16	26.21	170.39	61.7	23.52	21.54
ENSG00000167799	NUDT8	nudix hydrolase 8 [Source:HGNC Symbol;Acc:HGNC:8055]	2.67875	6.465	0.296832	-1.75228	0.000374342	0.0252844	down	2	3.81	2.15	4	2.44	1.66	2.87	2.5	4.44	3.14	3.05	14.23	11.53	10.35	2.71	2.27
ENSG00000100167	SEPTIN3	septin 3 [Source:HGNC Symbol;Acc:HGNC:10750]	1.56375	0.41875	3.69403	1.88519	0.000382073	0.0255762	up	0.95	0.55	1.94	0.38	2.85	2.46	2.46	0.92	0.24	0.52	1.1	0.12	0.03	0.45	0.27	0.62
ENSG00000075702	WDR62	WD repeat domain 62 [Source:HGNC Symbol;Acc:HGNC:24502]	1.73375	6.27625	0.256919	-1.96062	0.000391869	0.0260202	down	1.8	1.72	3.11	1.98	0.96	1.63	2.2	0.47	3.76	2.19	1.98	2.12	19.41	13.34	1.63	5.78
ENSG00000134376	CRB1	crumbs cell polarity complex component 1 [Source:HGNC Symbol;Acc:HGNC:2343]	0.03125	0.175	0.087586	-3.51316	0.000394491	0.0260202	down	0	0.07	0.07	0	0	0.02	0.09	0	0.13	0.04	0.03	0.03	0.4	0.04	0.04	0.69
ENSG00000146281	PM20D2	peptidase M20 domain containing 2 [Source:HGNC Symbol;Acc:HGNC:21408]	2.5925	5.165	0.367028	-1.44604	0.000393621	0.0260202	down	1.58	3.91	3.4	1.92	2.38	2.56	1.66	3.33	5.46	3.33	1.36	2.37	12.33	6.82	4.31	5.34
ENSG00000196917	HCAR1	hydroxycarboxylic acid receptor 1 [Source:HGNC Symbol;Acc:HGNC:4532]	0.15875	0.8575	0.1403	-2.83341	0.000392713	0.0260202	down	0.03	0.74	0.05	0.28	0.02	0.03	0.03	0.09	4.16	0.09	0.07	0.57	0.71	0.52	0.38	0.36
ENSG00000084674	APOB	apolipoprotein B [Source:HGNC Symbol;Acc:HGNC:603]	0.05375	0.6	0.0658101	-3.92555	0.000402905	0.0264975	down	0	0.07	0.02	0.01	0.12	0.09	0	0.12	1.11	0.01	0.01	0.02	0.04	0.07	3.18	0.36
ENSG00000104147	OIP5	Opa interacting protein 5 [Source:HGNC Symbol;Acc:HGNC:20300]	1.11625	2.945	0.27898	-1.84177	0.000404965	0.0265553	down	1.79	0.65	0.99	1.47	1.04	0.84	1.64	0.51	1.67	1.9	1.13	5.64	5.34	2.22	0.97	4.69
ENSG00000154263	ABCA10	ATP binding cassette subfamily A member 10 [Source:HGNC Symbol;Acc:HGNC:30]	1.125	4.2975	0.152809	-2.7102	0.000407641	0.0266531	down	0.81	3.97	0.42	0.54	0.55	0.54	0.41	1.76	2.21	0.59	0.38	1.79	18.52	6.32	2.18	2.39
ENSG00000167434	CA4	carbonic anhydrase 4 [Source:HGNC Symbol;Acc:HGNC:1375]	0.74375	5.3225	0.0896774	-3.47911	0.00041236	0.0268058	down	0.7	3.56	0.37	0.58	0.21	0.15	0	0.38	2.85	0.09	0.2	1.16	19.08	0.39	1.98	16.83
ENSG00000182533	CAV3	caveolin 3 [Source:HGNC Symbol;Acc:HGNC:1529]	0.00875	11.6188	0.00120162	-9.7008	0.000425594	0.0275071	down	0	0	0	0	0.07	0	0	0	0.21	0	0	1	51.59	40.03	0	0.12
ENSG00000177453	NIM1K	NIM1 serine/threonine protein kinase [Source:HGNC Symbol;Acc:HGNC:28646]	0.46875	1.1425	0.308726	-1.6956	0.000427447	0.0275477	down	0.36	0.83	1.12	0.37	0.38	0.37	0.11	0.21	1.92	0.89	0.27	1.38	0.31	1	1.08	2.29
ENSG00000101638	ST8SIA5	ST8 alpha-N-acetyl-neuraminide alpha-2,8-sialyltransferase 5 [Source:HGNC Symbol;Acc:HGNC:17827]	0.0675	0.40375	0.172484	-2.53547	0.000433951	0.0278869	down	0.06	0.26	0.05	0.07	0.07	0.02	0.01	0	0.02	1.58	0.01	0.5	0.45	0.43	0.19	0.05
ENSG00000141965	FEM1A	fem-1 homolog A [Source:HGNC Symbol;Acc:HGNC:16934]	0.82875	2.8325	0.205497	-2.28281	0.000438851	0.0281215	down	1	0.98	1.09	0.62	0.79	0.97	0.73	0.45	1.41	0.74	1.58	0.25	9.02	8.06	0.3	1.3
ENSG00000018625	ATP1A2	ATPase Na+/K+ transporting subunit alpha 2 [Source:HGNC Symbol;Acc:HGNC:800]	4.01375	66.375	0.0863019	-3.53446	0.000446811	0.0285196	down	0.13	16.23	0.49	0.38	5.21	0.87	1.63	7.17	21.09	0.73	0.1	5.48	342.77	150.34	8.83	1.66
ENSG00000163995	ABLIM2	actin binding LIM protein family member 2 [Source:HGNC Symbol;Acc:HGNC:19195]	4.22	11.47	0.191856	-2.3819	0.0004476	0.0285196	down	1.95	11.25	6.92	3.7	2.48	3.68	2.78	1	9.16	2.87	0.83	5.26	29.32	35.3	7.13	1.89
ENSG00000174669	SLC29A2	solute carrier family 29 member 2 [Source:HGNC Symbol;Acc:HGNC:11004]	0.4425	8.56	0.185818	-2.42804	0.000453914	0.0288402	down	0.62	0.8	0.48	0.35	0.35	0.19	0.49	0.26	0.76	0.33	0.52	0.56	53.89	10.77	0.84	0.81
ENSG00000049769	PPP1R3F	protein phosphatase 1 regulatory subunit 3F [Source:HGNC Symbol;Acc:HGNC:14944]	2.035	3.3075	0.4612	-1.11654	0.000455426	0.0288547	down	1.47	3.35	2.34	3.08	1.41	1.46	1.26	1.91	2.07	2.73	2.18	3.38	5.1	4.02	2.5	4.48
ENSG00000205221	VIT	vitrin [Source:HGNC Symbol;Acc:HGNC:12697]	3.215	10.8912	0.206567	-2.27531	0.000460292	0.0290811	down	0.33	6.21	3.47	1.92	5.99	3.11	2.47	2.22	18.01	0.33	1.54	9.02	16.86	16.88	3.45	21.04
ENSG00000130528	HRC	histidine rich calcium binding protein [Source:HGNC Symbol;Acc:HGNC:5178]	1.6875	26.5862	0.109613	-3.18951	0.000463894	0.0292266	down	0.57	4.99	0.79	2.63	1.33	0.45	0.12	2.62	1.46	0.31	2.12	4.88	127.04	72.57	3.5	0.81
ENSG00000030304	MUSK	muscle associated receptor tyrosine kinase [Source:HGNC Symbol;Acc:HGNC:7525]	0.12375	0.3075	0.0734136	-3.76781	0.000467705	0.0293818	down	0	0.24	0	0.6	0.05	0.07	0.03	0	0.03	0.01	0.03	0.17	1.74	0.42	0.03	0.03
ENSG00000099624	ATP5F1D	ATP synthase F1 subunit delta [Source:HGNC Symbol;Acc:HGNC:837]	40.6112	86.1287	0.362208	-1.46511	0.00046897	0.0293818	down	39.85	50.84	39.49	44.46	39.1	35.22	45.19	30.74	60.94	33.51	77.06	99.45	212.85	106.42	71.34	27.46
ENSG00000070808	CAMK2A	calcium/calmodulin dependent protein kinase II alpha [Source:HGNC Symbol;Acc:HGNC:1460]	0.94	14.3462	0.167118	-2.58106	0.000472779	0.0294805	down	0.31	1.31	1.7	1.19	0.29	1.02	0.83	0.87	0.88	2.85	0.89	0.59	79.78	28.01	0.58	1.19
ENSG00000260260	SNHG19	small nucleolar RNA host gene 19 [Source:HGNC Symbol;Acc:HGNC:49574]	8.78375	21.4725	0.367563	-1.44394	0.000473167	0.0294805	down	6.67	8.68	5.34	15.95	11.2	6.61	7.31	8.51	17.79	4.52	18.97	29.97	30.5	35.89	23.48	10.66
ENSG00000138162	TACC2	transforming acidic coiled-coil containing protein 2 [Source:HGNC Symbol;Acc:HGNC:11523]	17.5725	37.5	0.226385	-2.14315	0.000478153	0.0297089	down	6.72	31.52	20.03	15.36	22.33	11.8	8.01	24.81	24.42	13.62	9.11	18.54	108.87	70.78	33.54	21.12
ENSG00000062282	DGAT2	diacylglycerol O-acyltransferase 2 [Source:HGNC Symbol;Acc:HGNC:16940]	3.72	25.7087	0.0875076	-3.51445	0.000480921	0.0297986	down	1.32	21.56	1.06	2.29	0	0.67	0.78	2.08	135.73	1.01	0.49	33.54	5.82	11.85	8.55	8.68
ENSG00000198692	EIF1AY	eukaryotic translation initiation factor 1A Y-linked [Source:HGNC Symbol;Acc:HGNC:3252]	5.6025	0.015	98.2747	6.61875	0.000491552	0.0303736	up	12.38	0	0.04	0.03	16.15	16.22	0	0	0	0	0	0.05	0	0.05	0	0.02
ENSG00000070159	PTPN3	protein tyrosine phosphatase non-receptor type 3 [Source:HGNC Symbol;Acc:HGNC:9655]	2.115	5.2	0.290569	-1.78305	0.00051095	0.0314857	down	0.84	3.52	4.86	2.05	1.29	1.2	1.23	1.93	3.98	3.17	0.95	1.26	13.48	13.01	2.79	2.96
ENSG00000277632	CCL3	C-C motif chemokine ligand 3 [Source:HGNC Symbol;Acc:HGNC:10627]	134.257	33.1788	4.03852	2.01383	0.000512588	0.0315003	up	131.38	28.18	156	54.69	84.52	399.6	133.39	86.3	20.73	31.57	93.1	10.09	1.55	11.87	34.26	62.26
ENSG00000249502	MED28-DT	MED28 divergent transcript [Source:HGNC Symbol;Acc:HGNC:55567]	0.82125	0.23625	3.15603	1.65811	0.000514256	0.0315167	up	0.87	1	0.43	0.56	2.09	0.81	0.39	0.42	0.35	0.59	0.25	0.06	0.07	0.25	0.06	0.26
ENSG00000146147	MLIP	muscular LMNA interacting protein [Source:HGNC Symbol;Acc:HGNC:21355]	6.6275	15.5725	0.110233	-3.18138	0.000519448	0.0317485	down	0.41	19.7	3.12	4.77	5.29	2.91	4.67	12.15	2.08	1.26	0.95	26.66	52.53	31.16	3.07	6.87
ENSG00000135744	AGT	angiotensinogen [Source:HGNC Symbol;Acc:HGNC:333]	6.925	27.075	0.206093	-2.27863	0.000534636	0.0325112	down	0.51	19.37	6.67	6.64	5.36	1.92	2.83	12.1	84.04	4.58	1.88	37.15	10.09	10.01	61.9	6.95
ENSG00000167641	PPP1R14A	protein phosphatase 1 regulatory inhibitor subunit 14A [Source:HGNC Symbol;Acc:HGNC:14871]	6.675	17.0975	0.32875	-1.60494	0.000534819	0.0325112	down	3.09	14.09	3.65	5.91	9.52	2.81	2.32	12.01	35.82	5.78	6.41	17.9	16.14	23.14	25.45	6.14
ENSG00000245910	SNHG6	small nucleolar RNA host gene 6 [Source:HGNC Symbol;Acc:HGNC:32965]	56.7163	115.653	0.377179	-1.40668	0.000540445	0.0326766	down	45.93	66.99	55.47	54.96	42.74	52.42	58.91	76.31	72.3	55.66	66.04	229.86	172.3	153.29	127.76	48.01
ENSG00000189058	APOD	apolipoprotein D [Source:HGNC Symbol;Acc:HGNC:612]	38.0662	182.488	0.134579	-2.89347	0.000544987	0.0328628	down	14.89	152.22	16.52	38.67	16.07	50.44	1.13	14.59	219.74	11.95	4.02	282.23	509.53	220.08	204.2	8.15
ENSG00000128482	RNF112	ring finger protein 112 [Source:HGNC Symbol;Acc:HGNC:12968]	1.48125	3.1275	0.353996	-1.4982	0.000555106	0.0331179	down	0.3	4.73	1.27	1.47	1.68	0.53	0.38	1.49	3.03	1.43	2.3	1.17	3.72	8.17	1.98	3.22
ENSG00000143847	PPFIA4	PTPRF interacting protein alpha 4 [Source:HGNC Symbol;Acc:HGNC:9248]	3.64375	6.60125	0.269427	-1.89203	0.000553256	0.0331179	down	3.54	7.13	5.37	2.42	1.93	1.82	5.05	1.89	4.92	6.28	3.61	0.44	15.56	7.71	2.41	11.88
ENSG00000153531	ADPRHL1	ADP-ribosylhydrolase like 1 [Source:HGNC Symbol;Acc:HGNC:21303]	1.26625	19.885	0.361759	-1.4669	0.000553652	0.0331179	down	1.2	2.17	1.6	1.78	1.04	0.78	0.75	0.81	3.52	1.67	0.73	3.26	95.87	50.93	0.95	2.15
ENSG00000170634	ACYP2	acylphosphatase 2 [Source:HGNC Symbol;Acc:HGNC:180]	8.04625	25.9262	0.228187	-2.13171	0.000551542	0.0331179	down	6.41	8.72	8.73	7.47	7.32	8.95	9.5	7.27	6.76	7.47	12.25	12.96	107.71	49.28	6.41	4.57
ENSG00000197272	IL27	interleukin 27 [Source:HGNC Symbol;Acc:HGNC:19157]	0.57	0.04375	12.8206	3.68039	0.000558349	0.0332233	up	0.68	0.44	0.19	0.42	2.09	0.17	0.57	0	0	0.1	0	0	0	0.18	0.07	0
ENSG00000198840	MT-ND3	mitochondrially encoded NADH:ubiquinone oxidoreductase core subunit 3 [Source:HGNC Symbol;Acc:HGNC:7458]	5011.15	12553.9	0.361079	-1.46961	0.000561917	0.0332919	down	4473.3	6661.48	3706.89	5262.05	4126.74	2814.64	6184.74	6859.39	6654.76	3444.68	11856.5	11338.2	31494.1	17385.6	11241.5	7015.61
ENSG00000260401	-	novel transcript, overlapping to P2RY2	0.30625	0.99125	0.216049	-2.21057	0.000562463	0.0332919	down	0.22	0.52	0.39	0.31	0.21	0.27	0.34	0.19	0.16	0.07	0.13	0.7	2.95	1.05	0.76	2.11
ENSG00000169031	COL4A3	collagen type IV alpha 3 chain [Source:HGNC Symbol;Acc:HGNC:2204]	0.28125	7.42625	0.151555	-2.72209	0.000567186	0.033469	down	0.06	0.27	0.11	0.04	0.42	1.18	0.04	0.13	0.02	0.4	0.11	0.22	50.11	6.65	0.63	1.27
ENSG00000176842	IRX5	iroquois homeobox 5 [Source:HGNC Symbol;Acc:HGNC:14361]	1.18625	1.87875	0.485321	-1.04299	0.000573963	0.0336187	down	0.8	1.46	2.46	0.9	1.26	0.64	0.58	1.39	2.43	1.84	2.01	1.16	1.33	0.62	2.71	2.93
ENSG00000143416	SELENBP1	selenium binding protein 1 [Source:HGNC Symbol;Acc:HGNC:10719]	23.6062	61.1063	0.302124	-1.72679	0.000585762	0.034213	down	10.71	60.57	24.57	38.64	17.65	7.64	5.57	23.5	84.1	18.01	18.35	40.85	64.9	45.43	49.78	167.43
ENSG00000151948	GLT1D1	glycosyltransferase 1 domain containing 1 [Source:HGNC Symbol;Acc:HGNC:26483]	0.7325	3.36625	0.19635	-2.3485	0.000588819	0.034213	down	0.54	0.47	0.95	0.27	0.74	0.74	0.93	1.22	1.48	0.85	0.27	0.45	4.22	0.98	1.97	16.71
ENSG00000214456	PLIN5	perilipin 5 [Source:HGNC Symbol;Acc:HGNC:33196]	0.5425	7.18875	0.047469	-4.39687	0.000591714	0.034213	down	0.03	2.62	0.84	0.23	0	0.03	0.25	0.34	14.41	0	0	1.49	20.89	16.82	0.8	3.1
ENSG00000285628	-	novel transcript	0.66625	2.5875	0.205357	-2.2838	0.000590354	0.034213	down	0.7	0.72	1.17	0.59	0.63	0.31	0.46	0.75	1.42	1.98	1.19	0	4.95	4.28	0.46	6.42
ENSG00000236700	LINC01010	long intergenic non-protein coding RNA 1010 [Source:HGNC Symbol;Acc:HGNC:48978]	4.1175	1.925	5.9093	2.56299	0.00059496	0.0343124	up	9.81	1.76	2.58	0.91	1.53	2.96	12.67	0.72	0.65	2.67	10.31	0.55	0.03	0.89	0.05	0.25
ENSG00000172458	IL17D	interleukin 17D [Source:HGNC Symbol;Acc:HGNC:5984]	5.015	15.5813	0.213724	-2.22618	0.000601494	0.0346005	down	1.51	6.12	3.07	6.73	8.25	2.24	1.4	10.8	6.88	3.51	5.21	13.66	63.13	13.65	12.27	6.34
ENSG00000143028	SYPL2	synaptophysin like 2 [Source:HGNC Symbol;Acc:HGNC:27638]	1.1775	17.8425	0.176807	-2.49975	0.00060639	0.0347931	down	0.94	1.85	1.6	1.65	0.89	0.69	0.67	1.13	1.9	0.88	0.52	1.37	108.63	27.49	1.33	0.62
ENSG00000179965	ZNF771	zinc finger protein 771 [Source:HGNC Symbol;Acc:HGNC:29653]	2.15875	3.515	0.486013	-1.04093	0.000609854	0.0349029	down	1.35	2.8	3.11	3.46	1.79	1.3	1.11	2.35	5.04	2.49	3.87	5.16	2.97	2.58	3.65	2.36
ENSG00000166896	ATP23	ATP23 metallopeptidase and ATP synthase assembly factor homolog [Source:HGNC Symbol;Acc:HGNC:29452]	3.20875	7.045	0.375894	-1.4116	0.000615782	0.0351527	down	1.99	5.89	1.71	2.88	2.36	2.3	3.06	5.48	5.71	5.4	1.72	7.1	14.02	7.34	6.88	8.19
ENSG00000274026	FAM27E3	family with sequence similarity 27 member E3 [Source:HGNC Symbol;Acc:HGNC:28655]	0.3675	0.845	0.339041	-1.56047	0.000620135	0.0353116	down	0.32	0.7	0.47	0.56	0.31	0.05	0.21	0.32	0.73	0.42	0.65	0.34	0.78	1.05	2.1	0.69
ENSG00000182795	C1orf116	chromosome 1 open reading frame 116 [Source:HGNC Symbol;Acc:HGNC:28667]	0.01625	0.17625	0.072052	-3.79482	0.000630613	0.0357273	down	0.02	0.03	0	0	0.02	0.03	0	0.03	0.03	0	0	0.05	0.13	0.05	0.97	0.18
ENSG00000115592	PRKAG3	protein kinase AMP-activated non-catalytic subunit gamma 3 [Source:HGNC Symbol;Acc:HGNC:9387]	0.27625	6.5575	0.12011	-3.05758	0.000632731	0.0357572	down	0.07	0.06	0.51	0.09	0.13	0.49	0.65	0.21	0.33	0.27	0.27	1.07	32.74	17.28	0.36	0.14
ENSG00000087884	AAMDC	adipogenesis associated Mth938 domain containing [Source:HGNC Symbol;Acc:HGNC:30205]	25.5663	67.1025	0.293526	-1.76844	0.000647256	0.0363952	down	21.76	34.34	20.56	31.34	29.68	17.5	24.21	25.14	33.22	29.6	43.02	56.11	227.87	91.68	42.93	12.39
ENSG00000273420	-	novel transcript	0.03375	2.315	0.0173594	-5.84814	0.000647078	0.0363952	down	0	0	0	0	0.27	0	0	0	0	0	0	12.32	1.2	1.62	3.38	0
ENSG00000147454	SLC25A37	solute carrier family 25 member 37 [Source:HGNC Symbol;Acc:HGNC:29786]	20.5613	72.7712	0.311433	-1.68301	0.000667743	0.0374536	down	11.71	30.62	32.55	13.22	17.38	14.52	15.12	29.37	55.23	22.85	10.55	39.16	20.23	26.29	142.6	265.26
ENSG00000234964	FABP5P7	fatty acid binding protein 5 pseudogene 7 [Source:HGNC Symbol;Acc:HGNC:31070]	2.19375	69.2662	0.0242238	-5.36743	0.000675785	0.0378103	down	6	2.37	0	0	0	0	0	9.18	0	6.05	95.84	351.32	19.97	29.06	49.37	2.52
ENSG00000081248	CACNA1S	calcium voltage-gated channel subunit alpha1 S [Source:HGNC Symbol;Acc:HGNC:1397]	0.0275	19.5587	0.00242398	-8.68841	0.000677679	0.0378222	down	0	0.03	0	0.16	0.03	0	0	0	0	0	0.03	1.17	117.62	37.62	0	0.03
ENSG00000223609	HBD	hemoglobin subunit delta [Source:HGNC Symbol;Acc:HGNC:4829]	2.4475	182.725	0.0391564	-4.67461	0.000681266	0.0379283	down	0.39	0	2.79	0.22	0.4	0.34	0	15.44	0	7.71	0	38.14	1.04	0.59	74.52	1339.8
ENSG00000239219	-	novel transcript, antisense to SEC62	0.00625	0.135	0.0721364	-3.79313	0.000693347	0.0385056	down	0.01	0	0.01	0	0.02	0	0.01	0	0.01	0.03	0	0.03	0.12	0.16	0.07	0.66
ENSG00000091262	ABCC6	ATP binding cassette subfamily C member 6 [Source:HGNC Symbol;Acc:HGNC:57]	0.405	1.415	0.236021	-2.08301	0.000700187	0.0385995	down	0.16	0.95	0.41	0.33	0.23	0.44	0.46	0.26	2.65	0.21	0.56	0.19	1.69	0.16	1.96	3.9
ENSG00000241343	RPL36A	ribosomal protein L36a [Source:HGNC Symbol;Acc:HGNC:10359]	159.606	345.144	0.346535	-1.52893	0.000698012	0.0385995	down	155.07	173.2	126.29	244.77	85.15	146.44	162.74	183.19	267.14	169.87	257.03	928.46	207.18	372.84	417.31	141.32
ENSG00000188580	NKAIN2	sodium/potassium transporting ATPase interacting 2 [Source:HGNC Symbol;Acc:HGNC:16443]	0.0875	0.3025	0.16228	-2.62344	0.000711201	0.0389205	down	0	0.2	0.13	0.09	0.05	0.07	0.05	0.11	0.26	0.03	0	0.15	1.05	0.4	0.21	0.32
ENSG00000204334	ERICH2	glutamate rich 2 [Source:HGNC Symbol;Acc:HGNC:44395]	0.09375	0.6125	0.171066	-2.54737	0.000709782	0.0389205	down	0.05	0	0.05	0	0.12	0	0.32	0.21	0.83	1.63	0	0.61	0.55	0.38	0.52	0.38
ENSG00000102837	OLFM4	olfactomedin 4 [Source:HGNC Symbol;Acc:HGNC:17190]	0.2925	13.135	0.105827	-3.24022	0.000725792	0.03955	down	0.08	0.09	0.25	0	0.11	0	0	1.81	0.16	1.08	0	1.61	0.87	0.13	2.41	98.82
ENSG00000217930	PAM16	presequence translocase associated motor 16 [Source:HGNC Symbol;Acc:HGNC:29679]	13.93	25.2462	0.480968	-1.05599	0.000726649	0.03955	down	9.45	19.83	18.66	12.57	10.18	17	14.98	8.77	26.46	14.51	12.24	26.13	42.48	38.52	23.79	17.84
ENSG00000282033	-	novel transcript	0.47375	5.23	0.0638779	-3.96854	0.000727979	0.03955	down	0.13	0.66	0.35	0	1.08	0	0.85	0.72	0	0	0	2.62	21.97	11.94	1.82	3.49
ENSG00000164619	BMPER	BMP binding endothelial regulator [Source:HGNC Symbol;Acc:HGNC:24154]	2.9025	5.1425	0.45186	-1.14605	0.000739387	0.0397854	down	2.45	5.99	2.43	3.46	2.02	2.5	1	3.37	8.41	4.62	6.97	1.45	6.18	1.95	4.75	6.81
ENSG00000170323	FABP4	fatty acid binding protein 4 [Source:HGNC Symbol;Acc:HGNC:3559]	93.2188	653.326	0.0908367	-3.46058	0.000737667	0.0397854	down	8.03	439.77	15.52	229.5	6.89	13.35	5.83	26.86	2207.64	10.99	6.99	2242.09	280.25	263.16	164.15	51.34
ENSG00000177666	PNPLA2	patatin like phospholipase domain containing 2 [Source:HGNC Symbol;Acc:HGNC:30802]	50.1362	120.332	0.34296	-1.54389	0.000737007	0.0397854	down	32.77	131.01	64.45	31.59	28.42	40.59	41.43	30.83	489.81	31.52	36.39	61.4	55.67	87.72	99.2	100.95
ENSG00000105852	PON3	paraoxonase 3 [Source:HGNC Symbol;Acc:HGNC:9206]	0.4725	1.965	0.215808	-2.21218	0.000747695	0.0400408	down	0.27	0.54	0.58	1.23	0.55	0.07	0.03	0.51	2.64	0.54	0.12	1.57	1.66	0.58	6.75	1.86
ENSG00000183695	MRGPRX2	MAS related GPR family member X2 [Source:HGNC Symbol;Acc:HGNC:17983]	0.01875	0.18375	0.0762893	-3.71238	0.000750292	0.0400611	down	0	0	0.06	0.05	0	0	0.04	0	0.09	0.09	0	0.08	0.3	0.77	0.06	0.08
ENSG00000255135	EMSY-DT	EMSY divergent transcript [Source:HGNC Symbol;Acc:HGNC:55507]	2.08375	4.245	0.378536	-1.4015	0.000751635	0.0400611	down	2.11	3.04	1.85	2.84	1.17	0.97	2.76	1.93	3.33	1.3	3.08	5.22	6.46	7.08	3.93	3.56
ENSG00000173868	PHOSPHO1	phosphoethanolamine/phosphocholine phosphatase 1 [Source:HGNC Symbol;Acc:HGNC:16815]	1.3025	6.52875	0.173997	-2.52287	0.000762555	0.0403562	down	0.67	1.5	3.72	0.64	0.79	0.63	0.23	2.24	1.7	0.61	0.26	2.02	0.48	8.17	8.29	30.7
ENSG00000196465	MYL6B	myosin light chain 6B [Source:HGNC Symbol;Acc:HGNC:29823]	30.7362	68.26	0.331692	-1.59209	0.000762362	0.0403562	down	22.58	31.5	31.78	53.71	21.68	19.99	22.43	42.22	46.67	29.69	40.83	69.9	166.89	129.02	38.3	24.78
ENSG00000157150	TIMP4	TIMP metallopeptidase inhibitor 4 [Source:HGNC Symbol;Acc:HGNC:11823]	12.1037	36.1175	0.253726	-1.97866	0.000773098	0.0408181	down	2.65	42.35	9.38	14.53	9.19	8.96	2.91	6.86	137.3	11.13	6.05	53.24	19.52	18.48	23.19	20.03
ENSG00000241935	HOGA1	4-hydroxy-2-oxoglutarate aldolase 1 [Source:HGNC Symbol;Acc:HGNC:25155]	0.37125	1.2925	0.272114	-1.87771	0.000777312	0.0409445	down	0.07	1.17	0.43	0.45	0.12	0.11	0.21	0.41	2.16	0.82	0.09	1.75	1	2.08	0.69	1.75
ENSG00000165917	RAPSN	receptor associated protein of the synapse [Source:HGNC Symbol;Acc:HGNC:9863]	0.30375	5.74125	0.0616836	-4.01897	0.000786293	0.0413208	down	0.48	0.43	0.23	0	0	0.29	1	0	0.18	0.32	0.87	1.08	27.52	15.91	0.05	0
ENSG00000164104	HMGB2	high mobility group box 2 [Source:HGNC Symbol;Acc:HGNC:5000]	53.2638	114.195	0.378095	-1.40318	0.000808316	0.0422806	down	49.4	60.6	66.11	72.12	43.23	46.78	46.74	41.13	70.83	69.01	36.56	139.09	41.92	48.08	101.02	407.05
ENSG00000189227	C15orf61	chromosome 15 open reading frame 61 [Source:HGNC Symbol;Acc:HGNC:34453]	1.75625	2.35	0.423285	-1.2403	0.000806686	0.0422806	down	1.3	1.73	1.87	1.77	1.79	2.49	1.4	1.7	1.64	2.17	1.61	2.35	3.94	3.06	2.31	1.72
ENSG00000138796	HADH	hydroxyacyl-CoA dehydrogenase [Source:HGNC Symbol;Acc:HGNC:4799]	32.3687	62.365	0.412704	-1.27682	0.000811278	0.042337	down	21.74	39.35	34.86	35.94	26.27	42.43	31.47	26.89	101.86	35.14	30.63	43.24	142.98	84.98	30.95	29.14
ENSG00000130876	SLC7A10	solute carrier family 7 member 10 [Source:HGNC Symbol;Acc:HGNC:11058]	0.70625	3.28625	0.0262833	-5.24971	0.000826487	0.0426052	down	0	5.4	0	0.25	0	0	0	0	19.42	0.14	0	2.49	1.11	0.37	0.58	2.18
ENSG00000157119	KLHL40	kelch like family member 40 [Source:HGNC Symbol;Acc:HGNC:30372]	0.00875	14.1425	0.00101223	-9.94824	0.000823768	0.0426052	down	0	0	0	0	0	0.03	0	0.04	0	0	0.03	2.81	36.97	73.33	0	0
ENSG00000172318	B3GALT1	beta-1,3-galactosyltransferase 1 [Source:HGNC Symbol;Acc:HGNC:916]	0.185	0.59625	0.230746	-2.11562	0.000824442	0.0426052	down	0.08	0.25	0.29	0.09	0.24	0.09	0.01	0.43	0.35	0.19	0.03	0.35	1.01	0.73	0.65	1.46
ENSG00000196542	SPTSSB	serine palmitoyltransferase small subunit B [Source:HGNC Symbol;Acc:HGNC:24045]	0.11	0.3675	0.194467	-2.36241	0.000821944	0.0426052	down	0.03	0.26	0.07	0	0.05	0.1	0.21	0.16	0.07	0.25	0.13	0.29	0.26	0.76	1.04	0.14
ENSG00000289053	-	novel transcript	0.8475	0.21	4.57681	2.19434	0.000836621	0.0429618	up	1.27	0.69	1.63	0.25	1.3	0.78	0.28	0.58	0	0.4	0.24	0	0.17	0	0.31	0.56
ENSG00000110203	FOLR3	folate receptor gamma [Source:HGNC Symbol;Acc:HGNC:3795]	7.1225	5.6325	0.218189	-2.19635	0.000841319	0.0431047	down	1.47	0.31	1.35	0.71	1.66	3.88	46.41	1.19	6.14	1.32	16.92	0.35	0.75	2.97	2.64	13.97
ENSG00000276075	-	novel transcript, antisense to FAM65A	0.56125	1.43875	0.271015	-1.88355	0.000851144	0.043509	down	0.19	0.71	1.17	0.26	0.44	0.65	0.22	0.85	0.76	0.48	0.45	2.09	2.89	2.3	1.08	1.46
ENSG00000154080	CHST9	carbohydrate sulfotransferase 9 [Source:HGNC Symbol;Acc:HGNC:19898]	0	0.10625	0.0271333	-5.20379	0.000855479	0.0436314	down	0	0	0	0	0	0	0	0	0.14	0	0	0	0.13	0.04	0.26	0.28
ENSG00000101605	MYOM1	myomesin 1 [Source:HGNC Symbol;Acc:HGNC:7613]	3.30375	43.1	0.126485	-2.98296	0.000869004	0.0440217	down	1	7.6	2.46	4.68	2.4	0.97	1.06	6.26	3.97	1.01	1.21	5.4	221.22	105.88	3.28	2.83
ENSG00000164142	FHIP1A	FHF complex subunit HOOK interacting protein 1A [Source:HGNC Symbol;Acc:HGNC:34237]	0.12125	1.82375	0.176502	-2.50224	0.000868236	0.0440217	down	0.03	0.06	0.16	0.2	0.14	0.06	0.06	0.26	0.21	0.54	0.01	0.18	10.46	2.45	0.26	0.48
ENSG00000162543	UBXN10	UBX domain protein 10 [Source:HGNC Symbol;Acc:HGNC:26354]	1.9925	0.595	2.88215	1.52715	0.000875853	0.0442689	up	0.92	2.45	1.53	0.43	1.86	1.45	4.96	2.34	0.27	0.55	0.99	0.25	0.21	1.09	0.65	0.75
ENSG00000232044	SILC1	sciatic injury induced lincRNA upregulator of SOX11 [Source:HGNC Symbol;Acc:HGNC:26403]	0.14625	0.70875	0.203065	-2.29998	0.000881547	0.0443574	down	0.07	0.32	0.34	0.02	0.1	0.1	0.08	0.14	0.13	0.41	0.18	0.31	0.16	0.06	1.34	3.08
ENSG00000139219	COL2A1	collagen type II alpha 1 chain [Source:HGNC Symbol;Acc:HGNC:2200]	0.34625	267.171	0.0861489	-3.53702	0.000887377	0.0444519	down	0.32	0.51	0.68	0.7	0.02	0.02	0.17	0.35	0	1.09	0.14	1.45	0.14	0.15	13.26	2121.14
ENSG00000228035	NGF-AS1	NGF antisense RNA 1 [Source:HGNC Symbol;Acc:HGNC:53922]	0.02125	0.17125	0.0898566	-3.47623	0.000890809	0.0445246	down	0	0.03	0	0.04	0.03	0	0	0.07	0.38	0	0	0.32	0.05	0.25	0.1	0.27
ENSG00000276070	CCL4L2	C-C motif chemokine ligand 4 like 2 [Source:HGNC Symbol;Acc:HGNC:24066]	35.9988	8.9425	3.93637	1.97687	0.000916703	0.0456161	up	32.1	8.91	33.61	11	15.18	106.16	25.69	55.34	5.99	12.51	16.23	0.68	0.86	3.86	7.55	23.86
ENSG00000008394	MGST1	microsomal glutathione S-transferase 1 [Source:HGNC Symbol;Acc:HGNC:7061]	49.6187	115.646	0.288819	-1.79176	0.000929422	0.0458227	down	55.81	78.68	32.46	36.29	44.36	40.11	53.12	56.12	267.42	25.97	51.52	283.99	50.96	118.03	93.36	33.92
ENSG00000105825	TFPI2	tissue factor pathway inhibitor 2 [Source:HGNC Symbol;Acc:HGNC:11761]	0.86375	2.20875	0.199645	-2.32449	0.000929412	0.0458227	down	0.77	1.48	0.53	2.43	0.48	0.21	0.66	0.35	7.86	1.25	0.04	3.4	1.37	0.88	1.44	1.43
ENSG00000108018	SORCS1	sortilin related VPS10 domain containing receptor 1 [Source:HGNC Symbol;Acc:HGNC:16697]	0.065	0.255	0.203242	-2.29873	0.000929441	0.0458227	down	0.03	0.11	0.1	0	0.11	0.07	0.06	0.04	0.65	0.23	0	0.07	0.44	0.31	0.16	0.18
ENSG00000125967	NECAB3	N-terminal EF-hand calcium binding protein 3 [Source:HGNC Symbol;Acc:HGNC:15851]	7.87375	12.3287	0.43937	-1.18649	0.000925316	0.0458227	down	6.54	10.49	12.55	9.3	3.32	5.69	7.86	7.24	19.73	8.1	9.02	5.84	20.92	16.93	9.9	8.19
ENSG00000251257	-	novel transcript	1.06375	6.31375	0.150726	-2.73	0.000931041	0.0458227	down	0.53	2.32	0.59	0.4	1.71	0.41	0.95	1.6	2.2	1.56	0	11.37	15.98	17.26	1.28	0.86
ENSG00000063438	AHRR	aryl hydrocarbon receptor repressor [Source:HGNC Symbol;Acc:HGNC:346]	0.98375	0.4475	3.0074	1.58852	0.000936994	0.0459186	up	1.36	1.49	0.31	1.29	0.57	0.18	2.34	0.33	0.83	0.45	0.29	0.07	0.15	0.27	0.35	1.17
ENSG00000149294	NCAM1	neural cell adhesion molecule 1 [Source:HGNC Symbol;Acc:HGNC:7656]	2.0375	7.4625	0.205375	-2.28367	0.000937072	0.0459186	down	1.79	3.57	2.47	1.28	2.53	0.73	0.49	3.44	1.77	2.71	0.66	0.74	13.25	23.23	1.81	15.53
ENSG00000198892	SHISA4	shisa family member 4 [Source:HGNC Symbol;Acc:HGNC:27139]	14.5275	43.0562	0.250242	-1.9986	0.000949091	0.0464064	down	9.33	19.14	14.4	21.41	14.84	7.31	6.87	22.92	18.59	17.46	10.89	20.56	175.52	76.19	18.02	7.22
ENSG00000204248	COL11A2	collagen type XI alpha 2 chain [Source:HGNC Symbol;Acc:HGNC:2187]	0.8375	17.1212	0.255239	-1.97008	0.000958144	0.0467475	down	0.46	1.56	1.25	1.05	0.38	0.36	0.34	1.3	1.35	0.96	0.57	0.73	4.82	0.83	5.03	122.68
ENSG00000243147	MRPL33	mitochondrial ribosomal protein L33 [Source:HGNC Symbol;Acc:HGNC:14487]	87.9625	227.982	0.308623	-1.69608	0.000965622	0.0470103	down	71.36	95.88	63.48	118.94	88.98	55.19	80.04	129.83	97.1	74.84	107.98	308.71	675.75	354.21	140.77	64.5
ENSG00000101460	MAP1LC3A	microtubule associated protein 1 light chain 3 alpha [Source:HGNC Symbol;Acc:HGNC:6838]	11.0363	17.82	0.478783	-1.06256	0.00097452	0.0470373	down	8.47	17.05	13.42	16.41	9.09	6.77	5	12.08	28.45	10.9	13.38	15.73	21.15	19.9	25.04	8.01
ENSG00000149596	JPH2	junctophilin 2 [Source:HGNC Symbol;Acc:HGNC:14202]	0.78125	7.3275	0.161965	-2.62624	0.000972922	0.0470373	down	0.44	1.26	1.01	0.88	0.93	0.23	0.21	1.29	1.22	0.75	0.26	0.59	32.67	21.94	0.85	0.34
ENSG00000214872	SMTNL1	smoothelin like 1 [Source:HGNC Symbol;Acc:HGNC:32394]	0.745	26.81	0.0542373	-4.20457	0.00097002	0.0470373	down	0.2	0.7	1.09	0.17	2.6	0.69	0.39	0.12	0.06	0.78	0.44	1.45	128.2	83.06	0	0.49
ENSG00000266964	FXYD1	FXYD domain containing ion transport regulator 1 [Source:HGNC Symbol;Acc:HGNC:4025]	27.58	116.164	0.176495	-2.5023	0.000974541	0.0470373	down	2.9	47.73	6.87	38.8	35.35	9.93	7.89	71.17	41.28	10.02	21.92	76.67	472.93	184.05	93.05	29.39
ENSG00000139914	FITM1	fat storage inducing transmembrane protein 1 [Source:HGNC Symbol;Acc:HGNC:33714]	0.38375	9.38125	0.110932	-3.17225	0.000980034	0.0472011	down	0.34	1.03	0.49	0	0.5	0.26	0.36	0.09	0.16	0.29	0	0.46	54.8	16.66	0.78	1.9
ENSG00000283175	-	novel transcript, antisense to MASP1	0.47125	1.64375	0.200828	-2.31597	0.000984885	0.0473334	down	0	0.95	0.45	0.63	0.93	0.12	0.25	0.44	0.8	0.29	0.09	1.39	3.26	1.37	4.34	1.61
ENSG00000048540	LMO3	LIM domain only 3 [Source:HGNC Symbol;Acc:HGNC:6643]	0.545	1.99375	0.122986	-3.02343	0.000990567	0.047505	down	0	1.93	0.07	0.54	1.22	0.25	0	0.35	6.11	0.21	0	1.34	2.67	1.93	2.67	1.02
ENSG00000100628	ASB2	ankyrin repeat and SOCS box containing 2 [Source:HGNC Symbol;Acc:HGNC:16012]	2.0675	22.1137	0.142197	-2.81404	0.00100544	0.0480135	down	2.7	3.38	0.97	3.36	2.25	0.73	0.81	2.34	2.29	0.89	0.67	1.77	119.28	48.1	2.24	1.67
ENSG00000231437	LINC01750	long intergenic non-protein coding RNA 1750 [Source:HGNC Symbol;Acc:HGNC:52538]	0.42125	0.7125	0.265645	-1.91243	0.00100871	0.0480677	down	0.14	0.86	0.72	0.69	0.67	0.09	0.03	0.17	2.23	0.34	0.14	0.6	0.16	0.69	0.79	0.75
ENSG00000140905	GCSH	glycine cleavage system protein H [Source:HGNC Symbol;Acc:HGNC:4208]	9.0525	17.7013	0.398848	-1.32609	0.00101376	0.0481043	down	8.77	10.15	7.33	14.17	5.72	6.56	9.82	9.9	9.12	14.24	10.92	33.74	27.78	19.34	19.31	7.16
ENSG00000277449	CEBPB-AS1	CEBPB antisense RNA 1 [Source:HGNC Symbol;Acc:HGNC:51226]	0.445	1.07875	0.27124	-1.88236	0.0010124	0.0481043	down	0.18	1.26	0.36	0.39	0.27	0.32	0.27	0.51	0.34	0.38	0.49	0.49	3.63	1.29	1.11	0.9
ENSG00000177354	C10orf71	chromosome 10 open reading frame 71 [Source:HGNC Symbol;Acc:HGNC:26973]	0.00625	16.6825	0.00115596	-9.75669	0.00101625	0.0481209	down	0	0	0	0	0	0	0	0.05	0	0	0	0.33	87.87	45.24	0.01	0.01
ENSG00000101347	SAMHD1	SAM and HD domain containing deoxynucleoside triphosphate triphosphohydrolase 1 [Source:HGNC Symbol;Acc:HGNC:15925]	166.445	68.2963	2.14744	1.10262	0.00102331	0.0483537	up	128.68	136.5	146.24	87.39	329.77	205.16	166.74	131.08	77.02	112.59	117.58	40.29	15.69	79.72	35.68	67.8
ENSG00000164778	EN2	engrailed homeobox 2 [Source:HGNC Symbol;Acc:HGNC:3343]	0.0325	0.14125	0.173136	-2.53002	0.00104289	0.0490724	down	0.02	0.03	0.02	0	0.07	0.02	0.02	0.08	0.21	0.1	0	0.08	0.25	0.27	0.2	0.02
ENSG00000160886	LY6K	lymphocyte antigen 6 family member K [Source:HGNC Symbol;Acc:HGNC:24225]	0.5775	2.245	0.381276	-1.39109	0.00104999	0.0491385	down	0.42	0.93	0.4	0.62	0.62	0.58	0.35	0.7	1.88	1.67	0.1	8.27	1.14	1.49	2.2	1.21
ENSG00000185105	MYADML2	myeloid associated differentiation marker like 2 [Source:HGNC Symbol;Acc:HGNC:34548]	0.02625	5.41125	0.0157482	-5.98867	0.00105085	0.0491385	down	0.1	0	0.07	0	0	0	0	0.04	0.04	0.11	0.07	0.05	32.23	10.76	0	0.03
ENSG00000239569	KMT2E-AS1	KMT2E antisense RNA 1 [Source:HGNC Symbol;Acc:HGNC:40845]	2.34375	4.70875	0.3778	-1.4043	0.00105892	0.0494132	down	1.98	2.78	3.76	2.62	1.08	2.49	2.2	1.84	3.86	1.89	4.22	2.99	12.35	5.18	3.58	3.6
ENSG00000288904	-	novel transcript	0.3275	0.6225	0.435744	-1.19845	0.0010618	0.0494453	down	0.06	0.62	0.41	0.27	0.39	0.26	0.34	0.27	0.91	0.45	0.63	0.28	0.59	0.7	0.46	0.96
ENSG00000176171	BNIP3	BCL2 interacting protein 3 [Source:HGNC Symbol;Acc:HGNC:1084]	30.2975	47.5312	0.489613	-1.03029	0.00107039	0.0497421	down	28.89	31.73	25.32	34.14	34.05	34.21	30.36	23.68	51.3	46.33	22.78	59.41	74.22	64.93	35.32	25.96
